1 **Title: Global assessment of *Mycobacterium avium* subspecies *hominissuis* genetic**  
2 **requirement for growth and virulence.**

3

4 **Short title: MAH genetic requirement for growth and virulence.**

5

6 Marte S. Dragset<sup>1,2,3¶\*</sup>, Thomas R. Ioerger<sup>4¶</sup>, Maja Loevenich<sup>1</sup>, Markus Haug<sup>1,5</sup>,  
7 Niruja Sivakumar<sup>1</sup>, Anne Marstad<sup>1</sup>, Pere Joan Cardona<sup>2</sup>, Geir Klinkenberg<sup>6</sup>, Eric J.  
8 Rubin<sup>3</sup>, Magnus Steigedal<sup>1,3</sup>, Trude H. Flo<sup>1</sup>

9

10 <sup>1</sup> Centre of Molecular Inflammation Research and Department of Clinical and  
11 Molecular Medicine, Norwegian University of Science and Technology, Trondheim,  
12 Norway.

13 <sup>2</sup> Tuberculosis Research Unit, Germans Trias i Pujol Research Institute, Badalona,  
14 Barcelona, Spain.

15 <sup>3</sup> Department of Immunology and Infectious Diseases, Harvard T.H. Chan School of  
16 Public Health, Boston, Massachusetts, USA.

17 <sup>4</sup> Department of Computer Science and Engineering, Texas A&M University, College  
18 Station, Texas, USA.

19 <sup>5</sup> Department of Infection, St. Olavs University Hospital, Trondheim, Norway.

20 <sup>6</sup> Department of Biotechnology and Nanomedicine, SINTEF Materials and Chemistry,  
21 Trondheim, Norway.

22

23 \*Corresponding author

24 E-mail: [marte.dragset@ntnu.no](mailto:marte.dragset@ntnu.no) (MSD)

25 ¶These authors contributed equally to this work.

## 26 **Abstract**

27 Nontuberculous mycobacterial infections caused by the opportunistic pathogen  
28 *Mycobacterium avium* subsp. *hominissuis* (MAH) are currently receiving renewed  
29 attention due to increased incidence combined with difficult treatment. Insights into  
30 the disease-causing mechanisms of this species have been hampered by difficulties in  
31 genetic manipulation of the bacteria. Here, we identified and sequenced a highly  
32 transformable, virulent MAH clinical isolate susceptible to high-density transposon  
33 mutagenesis, facilitating global gene disruption and subsequent investigation of MAH  
34 gene function. By transposon insertion sequencing (TnSeq) of this strain, we defined  
35 the MAH genome-wide genetic requirement for virulence and *in vitro* growth, and  
36 organized ~3500 identified transposon mutants for hypothesis-driven research. The  
37 majority (71 %) of the genes we identified as essential for MAH *in vitro* had a  
38 growth-essential mutual ortholog in the related and highly virulent *M. tuberculosis*  
39 (*Mtb*). However, passaging our library through a mouse model of infection revealed a  
40 substantial number (54% of total hits) of novel virulence genes. Strikingly, > 97 % of  
41 the MAH virulence genes had a mutual ortholog in *Mtb*. Two of the three virulence  
42 genes specific to MAH (i.e. no *Mtb* mutual orthologs) were PPE proteins, a family of  
43 proteins unique to mycobacteria and highly associated with virulence. Finally, we  
44 validated novel genes as required for successful MAH infection; one encoding a  
45 probable MFS transporter and another a hypothetical protein located in immediate  
46 vicinity of six other identified virulence genes. In summary, we provide new,  
47 fundamental insights into the underlying genetic requirement of MAH for growth and  
48 host infection.

49

50

## 51 **Author summary**

52 Pulmonary disease caused by nontuberculous mycobacteria is increasing worldwide.  
53 The majority of these infections are caused by the *M. avium* complex (MAC),  
54 whereof >90% arise from *Mycobacterium avium* subsp. *hominissuis* (MAH).  
55 Treatment of MAH infections is currently difficult, with a combination of antibiotics  
56 given for at least 12 months. To control MAH by improved therapy, prevention and  
57 diagnostics, we need to understand the underlying mechanisms of infection. While  
58 genetic manipulation of pathogens is crucial to study pathogenesis, *M. avium* (*Mav*)  
59 has been found notoriously hard to engineer. Here, we identify an MAH strain highly  
60 susceptible to high-density transposon mutagenesis and transformation, facilitating  
61 genetic engineering and analysis of gene function. We provide crucial insights into  
62 this strain's global genetic requirements for growth and infection. Surprisingly, we  
63 find that the vast majority of genes required for MAH growth and virulence (96% and  
64 97%, respectively) have mutual orthologs in the tuberculosis-causing pathogen *M.*  
65 *tuberculosis* (*Mtb*). However, we also find growth and virulence genes specific to  
66 MAC species. Finally, we validate novel mycobacterial virulence factors that might  
67 serve as future drug targets for MAH-specific treatment, or translate to broader  
68 treatment of related mycobacterial diseases.

69

## 70 **Introduction**

71 *Mycobacterium avium* complex (MAC) is a group of genetically related and  
72 ubiquitously distributed opportunistic mycobacteria that can cause nontuberculous  
73 infections collectively called MAC disease [1]. *M. avium* (*Mav*), one of the MAC  
74 species, has been classified into subspecies *avium*, *paratuberculosis*, *silvaticum* and  
75 *hominissuis* based on molecular characterizations, prevalent hosts and diseases caused  
76 [2, 3]. The latter, *M. avium* subsp. *hominissuis* (MAH), can infect humans and lead to  
77 pulmonary and disseminated disease, particularly in immunocompromised individuals  
78 [4]. MAH infections are currently hard to treat, with a combination of antibiotics  
79 typically given for at least 12 months [5]. Similar to its relative *M. tuberculosis* (*Mtb*),  
80 the causative agent of tuberculosis, MAH proliferates within macrophages by  
81 hijacking normal phagosomal trafficking, overcoming the host's elimination strategies  
82 [6-12]. Mechanisms of infection may therefore partly be conserved between the two  
83 species. MAH lacks the Type VII ESX-1 secretion system crucial for full *Mtb*  
84 virulence [13], suggesting they also differ in virulence strategies. While *Mtb* is an  
85 obligate human pathogen in nature, with limited survival outside the host, *Mav* is  
86 environmental and opportunistic, found in a variety of niches (e.g. soil, fresh water,  
87 showerheads) and a range of prevalent hosts [3]. MAH isolates exhibit high genetic  
88 variation [14], perhaps as an adaptation to diverse niches and hosts. It is currently not  
89 known to what degree MAH and *Mtb* depend on similar mechanisms for growth and  
90 virulence, given the same selective conditions. Even so, MAH genes encoding factors  
91 required for basic proliferation and virulence may be attractive targets for improved  
92 MAH therapies, and may translate to the treatment of related mycobacterial diseases.

93 Transposon insertion sequencing (TnSeq), which combines transposon  
94 mutagenesis and massive parallel sequencing, has been widely used to determine the

95 conditional requirement of bacterial genes on a genome-wide scale [15]. By massive  
96 parallel sequencing of libraries consisting of more than 100 000 transposon mutants,  
97 the genetic requirement of *Mtb*, *M. marinum* and *M. avium* subsp. *paratuberculosis*  
98 has been defined, for *in vitro* growth or during infection [16-20]. For MAH,  
99 transposon mutagenesis has also been of great importance to identify virulence genes  
100 [21-28]. However, studies in MAH have to date been limited in library sizes,  
101 identifying a smaller number of potential virulence genes per screen. The majority of  
102 past MAH mutant libraries were constructed using the clinical isolate MAH 104 [21-  
103 25, 28]. 104 was the first MAH strain with a publicly available, fully assembled  
104 genome [29], and has thus naturally been widely studied, also by us (exemplified in  
105 [8, 10, 11, 29, 30]). MAH 104 is, however, resistant to transposon mutagenesis by  
106  $\phi$ MycoMarT7, the phagemid preferred to generate high-density mycobacterial  
107 libraries [16-20, 31, 32]. Moreover, MAH 104 (along with many other *Mav* strains)  
108 transforms with low efficiency [28, 33-35], complicating the use of this strain in  
109 hypothesis-driven genetic manipulation. To facilitate genome-wide investigation of  
110 MAH gene function, we identified an MAH strain (MAH 11) highly susceptible to  
111 both  $\phi$ MycoMarT7-mediated transposon mutagenesis and transformation. We used  
112 this strain to generate a transposon insertion library with ~66% saturation density,  
113 which we profiled for genes required *in vitro* and in a mouse model of infection. In  
114 fact, MAH 11 is currently used as a screening strain in mycobacterial drug discovery  
115 programs [36, 37], adding further value to determining the growth requirements of  
116 this particular strain. Finally, we constructed an ordered subset of our transposon  
117 library in 384-well format (with a unique clone in each well) and used a multiplex  
118 sequencing strategy to identify the disrupted gene in each well, providing access to  
119 ~3500 MAH mutants. With these, we validated novel MAH virulence factors. Fig 1

120 summarizes the overall experimental setup of our study.

121

## 122 **Results**

123 **Identification of a  $\phi$ MycoMarT7-transducible MAH strain.** We aimed to find an  
124 MAH strain in which we could create high-density transposon mutant libraries. The  
125 transposon donor phagemid  $\phi$ MycoMarT7 is widely used (and recommended over  
126 Tn5367 transposition [31]), for efficient mycobacterial transposon mutagenesis [16-  
127 20, 32].  $\phi$ MycoMarT7 is derived from  $\phi$ AE87, which originates from  
128 mycobacteriophage TM4 [38, 39]. TM4 has been inconsistent in its ability to  
129 transduce various *Mav* strains and unable to infect the commonly studied genome  
130 sequenced strain MAH 104 [40]. In agreement with these observations, we failed to  
131 obtain kanamycin resistant mutants (marker for successful transposition of the  
132  $\phi$ MycoMarT7-encoded *HimarI* transposon) when attempting to transduce MAH 104.  
133 Hence, to identify a  $\phi$ MycoMarT7-transducible strain of MAH, we screened seven in-  
134 house clinical *Mav* isolates originating from patients at the National Taiwan  
135 University Hospital, Taiwan. Around 70% of the strains resulted in kanamycin  
136 resistant colonies after transduction, indicating *HimarI* transposition. Based on  
137 particularly efficient transducibility (up to 300 000 kanamycin-resistant colonies per  
138 ml starting culture in our initial small-scale screen) and general ease to handle, we  
139 focused on a strain isolated from an HIV positive patient's bone marrow, MAH 11.  
140 By PCR, we confirmed the presence of transposon inserted in 10 out of 10 colonies  
141 tested (S1 Fig). Hence, this MAH strain is highly susceptible to  $\phi$ MycoMarT7-  
142 mediated transposon mutagenesis.

143

144 **MAH 11 genome sequence.** We sequenced the genome of the  $\phi$ MycoMarT7-  
145 transducible MAH 11 strain on an Illumina HiSeq 2500 instrument in paired-end  
146 mode with a read length of 125 bp, yielding a mean depth of coverage of 55.4. The  
147 sequence was assembled by a comparative assembly strategy, using MAH 104 as a  
148 reference sequence, augmented with contig-building to build large-scale indels. The  
149 Illumina data was supplemented with long reads (up to 40kb) from a PacBio  
150 sequencer, which were used to confirm the connectivity of the chromosome. The  
151 length of the genome is 5,105,085 bp, and is GC-rich (69.2%) like that of other  
152 mycobacteria (Fig 2A). The genome sequence is highly concordant with the recently  
153 reported draft genome of MAH 11 (70 contigs) [41]. The primary discrepancies  
154 involve repetitive sequence elements, such as differences in locations of native  
155 transposons and copy-numbers of MIRU tandem repeats, for which assembly from  
156 short reads can be ambiguous.

157 MAH 11 is positively identified as *M. avium* subsp. *hominissuis*, based on 16S  
158 rRNA and *hsp65* sequences that are identical to MAH 104 (but distinct from other  
159 subspecies, like *M. avium* subsp. *avium*) [2]. However, relative to MAH 104, there are  
160 substantial numbers of SNPs (approximately 10 SNPs per 1kb) and a cumulative loss  
161 of ~377 kb, showing it is a distinct lineage (Fig 3A). The reductions are clustered in  
162 several large-scale deletions, the largest of which (>40kb) are listed in Fig 3B. This  
163 variability has been seen in other *Mav* isolates [42, 43], and several of the large-scale  
164 deletions correspond to known large-scale polymorphisms [42]. In addition, there are  
165 several large-scale insertions (Fig. 3B), including a prophage (56 genes,  
166 *b6k05\_17725-18015*, inserted at coordinate 3.77 Mbp). This phage is almost identical  
167 to a prophage previously reported in the genome of *M. chimaera* str. MC045 (RefSeq  
168 NZ\_LT703505.1). Also, a cluster of 48 non-phage metabolic genes (*b6k05\_03885-*

169 04170; 57kb) is inserted in the tail of existing MAH 104 prophage phiMAV-1  
170 (*mav\_0779-0841*; [44]), containing a variety of hydrolases, reductases,  
171 dehydrogenases, and monooxygenases. This gene cluster has been previously  
172 observed in other MAH strains, e.g. strain H87 [45]. The MAH 11 genome contains at  
173 least 14 copies of IS1245 (similar to MAH 104; [46]), but none of IS901 (associated  
174 with members of the MAC complex primarily infecting birds; [42, 47]). S2 Fig shows  
175 the position of MAH 11 in a phylogenetic tree (created using PHYLIP,  
176 <http://evolution.genetics.washington.edu/phylip.html>) together with 21 other *M.*  
177 *avium* genomes obtained from NCBI GenBank, including *M. avium* subsp.  
178 *paratuberculosis* (MAP) K10 and three *M. avium* subsp. *avium* (MAA) as outgroup  
179 strains.

180 We identified 4653 ORFs (along with 1 copy of the rRNAs (16S, 23S, 5S) and  
181 42 tRNAs, similar to MAH 104) using the NCBI Prokaryotic Genome Annotation  
182 Pipeline [48]. 4211 genes have mutual orthologs with MAH 104 (where each gene in  
183 one organism is the best match for the ortholog in the other organism, with BLAST E-  
184 value  $< 10^{-10}$ , S1A Dataset). Almost all of these orthologs (4123) have  $\geq 96\%$  amino  
185 acid identity, and nearly half (1730) have 100% amino acid identity. For simplicity,  
186 we will, where applicable, refer to MAH ORFs using the MAH 104 locus tags  
187 (*mav\_xxxx*) from here on. Compared to *Mtb* (H37Rv), MAH 11 has ~500 more genes,  
188 and over half the genes in each genome (2681) has a mutual ortholog in the other  
189 genome (S1B Dataset). Most of the remaining genes also have orthologs, but their E-  
190 values are above the stringent threshold of  $10^{-10}$  (i.e. 1052 MAH genes have no clear  
191 *Mtb* ortholog, S1C Dataset), or their specific partner in the other genome is  
192 ambiguous, as is sometimes the case in duplicated gene families.

193



194 **MAH 11 plasmids.** Two large extra-chromosomal contigs that appear to represent  
195 circular plasmids were detected. One, pMD1 (193kb, 162 ORFs) (Fig 2B and S1D  
196 Dataset), bears weak similarity (based on BLAST search) to parts of plasmids in a  
197 wide range of other mycobacteria. The other, pMD2 (78kb, 66 ORFs) (Fig 2C and  
198 S1E Dataset), is nearly identical to conjugative plasmid pMA100 from MAH strain  
199 88Br (though reduced, since pMA100 is 116kb, S1F Dataset) [49], and bears partial  
200 similarity to the conjugative pRAW-like plasmids found in several slow-growing  
201 mycobacterial species [50].

202

203 **MAH 11 is highly transformable.** *Mav* is notoriously hard to transform [28, 33-35],  
204 complicating introduction of new DNA and thus genetic engineering of this species.  
205 In our and others' experience, MAH 104 is transformable with low efficiency [34,  
206 51]. We investigated the transformation frequency of MAH 11 and found that this  
207 strain is around 100 times more susceptible to obtain plasmid DNA compared to the  
208 104 strain, using optimized protocols for *Mav* electroporation (Fig 4A) [33]. We did  
209 not observe a notable difference in cell wall integrity (potentially explaining different  
210 susceptibility to electroporation) between MAH 11 and MAH 104 when subjecting  
211 them to sodium dodecyl sulfate (SDS) stress (S3 Fig). In summary, MAH 11 might be  
212 particularly apt for hypothesis-driven genetic approaches.

213

214 **MAH *in vitro* essential gene set.** To define genes required for MAH *in vitro* growth  
215 we generated, by  $\phi$ MycoMarT7-mediated transduction, a library of ~170,000  
216 transposon mutants selected on 7H10 medium. The *HimarI*-based mariner transposon  
217 of  $\phi$ MycoMarT7 inserts randomly at TA dinucleotides [52], of which there are 55,516  
218 sites in the MAH 11 genome (excluding plasmids). We sequenced the transposon

219 junctions of two independent libraries, mapped the genomic position of the  
220 transposon insertion sites (insertion counts), and counted insertions (reduced to  
221 unique templates using barcodes [53]) (S1 Table). The library had a saturation of  
222 66.3%, with insertions at 36,813 out of 55,516 TA sites. By gene requirement  
223 analysis, using a Hidden Markov Model incorporated into the Transit platform [54],  
224 we defined 362 genes as essential for *in vitro* growth, 312 as genes causing growth-  
225 defect when disrupted, 278 as genes causing growth-advantage when disrupted and  
226 3651 genes as non-essential for growth (Fig 4B, S1G Dataset). 71% (258/362) of  
227 MAH 11's essential genes had an essential ortholog in *Mtb* (as defined by DeJesus *et*  
228 *al.* [55]). Remarkably, very few MAH (15) and *Mtb* (10) essential genes (~4% and  
229 ~2% of total essentials, respectively) did not have a mutual ortholog in the other  
230 species (Fig 4C, S1G Dataset), suggesting that the vast majority of genes required for  
231 *in vitro* proliferation are conserved between MAH and *Mtb*.

232       Almost all genes found on the two MAH 11 plasmids were non-essential for *in*  
233 *vitro* growth (S1H and S1I Datasets). However, on pMD1, four genes caused growth  
234 defects of MAH 11 when disrupted; two encoding hypothetical proteins, one  
235 homologous to a gene encoding chromosome partitioning protein, *parB*, and one  
236 homologous to DNA processing protein-encoding *dprA*. On pMD2, a gene  
237 homologous to *rep*, involved in plasmid replication, caused growth defect when  
238 disrupted. Taken together, we identified 674 chromosomal and five plasmid MAH  
239 genes that were essential or caused a growth defect *in vitro* when disrupted.

240

241 **MAH 11 establishes infection in mice.** We and others have shown that MAH 104 is  
242 virulent in mice [8, 11, 12, 22]. We thus examined whether MAH 11 would be  
243 suitable to study the role of MAH genes *in vivo*. C57BL/6 mice were infected

244 *intraperitoneally* with MAH 11 or MAH 104, and organ bacterial load was analyzed  
245 in the chronic phase of infection. As we have previously shown, bacterial loads  
246 remained relatively constant in liver and spleen from 22 to 50 days after initial MAH  
247 104 infection [12]. The same trend was seen for MAH 11, albeit with an overall lower  
248 bacterial load compared to MAH 104, especially in the spleen (Fig 5A and B). MAH  
249 11 and 104 grew comparably in 7H9 medium (Fig 5C), suggesting MAH 11 is less  
250 virulent than MAH 104 in mice.

251 T cells produce effector cytokines upon activation to elicit an adaptive immune  
252 response towards infections. To control *Mav* infection, production of IFN $\gamma$  effector  
253 cytokine by CD4<sup>+</sup> T helper 1 cells is of particular importance [56]. We have  
254 previously monitored anti-mycobacterial T cell responses to MAH 104 [12]. To  
255 investigate whether MAH 11 is suitable to study MAH-specific host immune  
256 responses, we measured mycobacteria-specific CD4<sup>+</sup> T cell responses after mouse  
257 infection. Fig 5D shows frequencies of MAH-specific CD4<sup>+</sup> T helper 1 cells  
258 producing IFN $\gamma$  effector cytokine after infection. Interestingly, the frequencies of  
259 IFN $\gamma$ -producing CD4<sup>+</sup> T cells were found lower in MAH 11-infected mice compared  
260 to MAH 104-infected mice after 50 days of infection, possibly reflecting the lower  
261 organ bacterial loads (Fig 5A and B). Nevertheless, MAH 11 appears suitable to study  
262 mycobacterial disease mechanisms, as well as host responses, in a mouse infection  
263 model.

264

265 **MAH virulence gene set.** To identify genes required for MAH virulence we infected  
266 six mice with our MAH library and analyzed bacterial load from the spleen and liver  
267 (organs from two animals each were pooled, resulting in three spleen libraries and  
268 three liver libraries) after 26 days of infection. We sequenced the harvested libraries,

269 which yielded saturation of 61.9% and 71.0% (combined over replicates) for spleen  
270 and liver, respectively (S1 Table). We then defined the genetic requirement for  
271 infection using a Transit-incorporated resampling algorithm for comparative analysis  
272 [54], comparing output data from sequenced libraries before and after infection. We  
273 identified 144 and 128 genes as required for spleen and liver infection, respectively  
274 (S1B Dataset). 112 genes were required for survival in both organs (~80% overlap).  
275 Direct comparison of the spleen and liver datasets by resampling did not reveal any  
276 statistically significant differences, and hence no genes uniquely required for  
277 colonization of either organ were identified. Among the core genes identified (found  
278 in both spleen and liver) were 51 previously identified in *Mtb* mouse model TnSeq  
279 experiments [16], including well-established mycobacterial virulence genes like  
280 *uvrABC* (the UvrABC endonuclease complex [57]), *secA2* (alternative ATPase of Sec  
281 secretion pathway [58]), *icl* (isocitrate lyase [59]), *bioA* (within the biotin biosynthesis  
282 pathway [60]) and *glcb* (malate synthase [61]). However, importantly, we identified  
283 61 core genes (92 genes with spleen and liver genes combined) not previously  
284 detected by *Mtb* TnSeq virulence gene screening (Fig. 4D)[16]. Some of these genes  
285 were found in genetic clusters, like six genes within the region encoding the Type VII  
286 ESX-5 secretion system. Other genes were found in operons (for instance *prcA/prcB*,  
287 *mav\_3300/ripA*, *mav\_3691/rbfA*) or in close genomic vicinity  
288 (*mav\_4154/4158/4159/4160/4163*). Strikingly, only three (< 3%) core MAH virulence  
289 genes did not have a mutual ortholog in *Mtb* (Fig 4D). Two of them, *mav\_4273* and  
290 *mav\_4274*, are potentially co-expressed, and both encode proline-proline-glutamic  
291 acid (PPE) family proteins. PPE proteins might show ambiguity in ortholog matching  
292 due to large duplications within the family. However, by BLAST search, the two PPE  
293 proteins have clear orthologs in MAC species [62], but not in other well-known

294 mycobacterial species like *Mtb*, *M. bovis*, *M. abscessus* nor *M. leprae* (albeit both  
295 PPE proteins show a weak similarity to *M. marinum* PPE14 (*mmar\_1235*) with 53  
296 and 57% amino acid identity, respectively). The last of the three MAH virulence  
297 genes without *Mtb* mutual orthologs, *mav\_4409*, encodes a putative acyltransferase.

298 As could be expected, most genes found on the two MAH 11 plasmids were  
299 non-essential for infection (S1J-M Datasets); the only exceptions were an AAA-  
300 family ATPase on pMD1 (out of 162 ORFs), and two ORFs of unknown function on  
301 pMD2 (66 ORFs).

302

303 **Identification of mutants in an organized MAH library.** Organized libraries of  
304 insertion mutants are of great value for hypothesis-driven research. Vandewalle *et al.*  
305 developed a method where sequence tagging transposon library pools was used to  
306 bulk-identify, by TnSeq, both the gene disrupted and the location of the mutant within  
307 an organized (plated) *M. bovis* BCG transposon library [63]. We employed such a  
308 strategy to identify mutants within an ordered MAH 11 library of 9216 transposon-  
309 insertion mutants, plated in 384-well plates using a colony-picking robot. We tagged  
310 the library by plates, rows and columns, then pooled and sequenced the samples, and  
311 analyzed the barcode-to-genome coordinate maps to determine the location of the  
312 mutants and the transposon insertion sites in bulk. We were able to map the specific  
313 location of 2696 unique transposon insertion mutants within 1697 (34.8%) of the  
314 4881 MAH 11 ORFs (plasmid ORFs included) (S1N Dataset). Transposon insertion  
315 sites that mapped ambiguously to more than one plate, column and/or row were  
316 disregarded; these might be due to a relatively high number of mutant duplicates in  
317 the picked library. 3161 wells had a unique clone, and only 155 wells had more than  
318 one mutant assigned to them (S1O Dataset). The latter might be due to mutants

319 clumping in colonies picked, incomplete sterilization of the robotic picking device  
320 between rounds of colony picking, or transposon insertions in repetitive or duplicated  
321 regions. To experimentally verify the correct location of mutants, we sequenced 11  
322 mutants picked from 11 wells (S2 Table). All mutants had the transposon inserted at  
323 the location predicted by our TnSeq approach. Taken together, we identified the  
324 transposon insertion site and mapped the unambiguous location of 3489 clones  
325 (including those in intergenic regions), providing access to a plethora of mutants to  
326 study the role of the respective MAH genes.

327

328 ***uvrB* is required for MAH virulence.** UvrABC is an enzyme complex involved in  
329 *Escherichia coli* nucleotide excision repair [64]. The genes encoding the  
330 mycobacterial homologues of the three members of the complex, *uvrA*, *uvrB*, and  
331 *uvrC*, were all defined as virulence genes in our screen. *uvrB* has previously been  
332 implicated in *Mtb* virulence, via protection against host-mediated reactive nitrogen  
333 and oxygen intermediates [57]. To verify the involvement of *uvrB* in MAH virulence,  
334 we infected mice with an available *uvrB* transposon mutant (*uvrB::tn*) and  
335 complemented mutant for 26 days. *uvrB::tn* showed reduced bacterial burden in  
336 infected mice compared to MAH 11 wild-type (wt) and complement-infected animals  
337 (Fig 6A and B). Neither the *uvrB* mutant nor the complemented mutant showed  
338 reduced fitness *in vitro* (Fig 6E), hence, our results suggest that UvrB is required for  
339 full virulence in MAH.

340

341 **A probable MFS transporter is required for MAH virulence.** Next, we aimed to  
342 validate MAH determinants not previously implicated in mycobacterial virulence. A  
343 mutant of a probable MFS transporter, MAV\_1005 (ortholog of Rv0876c), showed

344 attenuated growth in our virulence screen. When we subjected an MAH 11 transposon  
345 mutant of this transporter (*1005::tn*) to mouse model infection, we saw a strong  
346 attenuation after 26 days of infection compared to wt and the complemented mutant  
347 (Fig 6A and B). Furthermore, the mutant but not the complemented mutant elicited a  
348 reduced MAH-specific CD4<sup>+</sup> effector T cell response from the host (Fig 6C and D).  
349 The mutant did not show reduced fitness *in vitro* (Fig 6E). Taken together, our results  
350 suggest that *mav\_1005* is crucial for MAH virulence.

351

352 **A hypothetical gene required for MAH virulence.** Five genes located in close  
353 genomic vicinity (region spanning from *mav\_4154* to *mav\_4163*, Fig 6F) appeared as  
354 hits in our virulence screen. An insertion mutant of one of the genes, hypothetical  
355 gene *mav\_4160* (*4160::tn*), was subjected to mouse model infection. After 26 days of  
356 infection, *4160::tn* showed attenuated growth in both liver and spleen (Fig 6A and B),  
357 though the MAH-specific effector CD4<sup>+</sup> T cell response was not significantly  
358 reduced (Fig 6C and D). The mutant did not show reduced fitness *in vitro* (Fig 6E).  
359 Hence, our findings suggest that *mav\_4160* is required for full MAH virulence.

360

361 **Inflammation and tissue pathology.** We performed a broader characterization of the  
362 inflammation and tissue pathology in MAH 11-infected mice (including mutants and  
363 complemented mutants) at day 26 post infection. In brief, induction of organ  
364 homogenate cytokine production was low or not increased in response to infection  
365 (TNF $\alpha$  and IFN $\gamma$ ), except for IL-1 $\beta$ , which largely reflected organ bacterial loads (Fig  
366 6 and S4 Fig). The overall low induction levels were not surprising; cytokines could  
367 be secreted by subsets of immune cells and act in an autocrine/paracrine manner e.g.  
368 in tissue granulomas. We have previously characterized the C57Bl/6 infection of

369 MAH 104 in great detail [12]. Similar to what we observed with MAH 104, MAH 11  
370 infection induced organ pathology seen as disruption of splenic pulp structures,  
371 infiltration of immune cells, inflammatory foci (granulomas) and giant cell formation  
372 (S5 Fig). However, no obvious differences in cytokine production or tissue pathology  
373 were seen between mutants and wt, nor mutants and complemented mutants.  
374 Nevertheless, the overall organ pathology and IL-1 $\beta$ -production grossly reflected  
375 bacterial loads.

376

## 377 **Discussion**

378 To study the role of genes by loss of function is a powerful approach to understand  
379 how pathogens proliferate and avoid host elimination. We identified a virulent clinical  
380 isolate of MAH susceptible to genome-wide high-density gene disruption by  
381  $\phi$ MycoMarT7-mediated transposon mutagenesis. The generated transposon library  
382 enabled us to define the MAH *in vitro* essential and virulence gene sets using a top-  
383 down discovery-based deep sequencing approach. A total of 674 genes were  
384 identified as required for normal growth *in vitro* (15% of total genes, similar to the  
385 proportion of required genes in *Mtb* [55]). There was a substantial overlap (71%) of *in*  
386 *vitro* essentials between MAH and *Mtb*, as well as many common virulence genes  
387 (e.g. *uvrABC*, *secA2*, *icl*) required for survival in a mouse model of infection.  
388 However, the majority of the virulence genes we identified were novel relative to *Mtb*  
389 TnSeq virulence screening [16]. Surprisingly, even with 1052 genes with no clear *Mtb*  
390 ortholog, only three of the MAH virulence genes were specific to MAH (i.e. did not  
391 have a mutual ortholog in the H37Rv genome). Two of these were PPE family  
392 proteins (*mav\_4273/4*, found in MAC species but not *Mtb* [62]), which are unique to  
393 mycobacteria, associated with virulence, and some have been shown to be secreted by



394 the ESX-5 secretion system in *M. marinum* and *Mtb* [65, 66]. In fact, we observed six  
395 genes within the MAH *esx-5* gene cluster among our virulence genes (*mav\_2916-*  
396 *2933*), strongly indicating a crucial role of ESX-5 during MAH infection. However,  
397 when we subjected an ESX-5 mutant (*eccA5::tn*) to mouse infection, we did not see  
398 attenuated growth compared to wt (S6 A, B and E Fig), perhaps due to insufficient  
399 disruption of gene function in this mutant (transposon insertion in C-terminus), or that  
400 this particular gene is not required for ESX-5-mediated virulence in mice, as  
401 previously seen for *Mtb* [67]. Intriguingly though, we saw an increased CD4<sup>+</sup> T cell  
402 host response when *eccA5* was overexpressed (S6 C and D Fig). Even so, it is  
403 possible that the two MAC-specific PPE proteins are secreted via the ESX-5 secretion  
404 system of MAH. These PPE proteins could be excellent candidates for targeted drug,  
405 vaccine and/or diagnostics discovery for improved control of MAC infections.

406 MAH and *Mtb* are both able to persist in human macrophages; however, *Mav* is  
407 environmental and opportunistic, while *Mtb* is an obligate human pathogen. The  
408 relatively modest overlap between MAH and *Mtb* in mutually orthologous virulence  
409 genes (46%) compared to the overlap of *in vitro* essential genes (71%) might reflect  
410 different mechanisms of virulence. However, interestingly, many of the genes that  
411 were unique to our MAH virulence screen have been experimentally proven required  
412 for *Mtb* virulence (exemplified by proteasome subunits *prcA*, *prcB* and genes  
413 encoding the *esx-5* secretion system [66, 68]). This suggests that a portion of the  
414 genes we found unique to MAH virulence, and that have *Mtb* mutual orthologs, might  
415 be required for *Mtb* virulence as well. Even so, it is evident that when MAH and *Mtb*  
416 are subjected to the same selective conditions (*in vitro* growth on 7H10 agar or *in vivo*  
417 growth in C57BL/6 mice), MAH depends on very few genes that do not have mutual  
418 orthologs in *Mtb* (~4% and ~3%, respectively). Whether this is true also for other

419 MAH isolates, remains to be investigated. None of the genes within the major MAH  
420 11 insertions (relative to MAH 104, listed in Figure 3B) were required for infection,  
421 and only four were essential *in vitro*. It has been shown that *M. marinum* customizes  
422 its virulence mechanisms to infect different animal cells [19]. It is thus possible that,  
423 if subjected to infection of other animal models, a greater proportion of genes specific  
424 to MAH would be required.

425 Interestingly, we identified genes on the two plasmids, pMD1 and pMD2, that  
426 were required for growth *in vitro* or *in vivo*. The *in vitro* growth defect seen in  
427 disruption of plasmid replication (*rep*) and partition (*parB*) genes might indicate that  
428 the presence of the two plasmids is required for efficient MAH proliferation, or that  
429 disturbing plasmid replication/partition reduces the global fitness of the MAH cells. It  
430 is currently unclear which role the three plasmid genes we found required *in vivo*  
431 might play during infection.

432 Using defined transposon mutants from our organized (plated) library, we  
433 validated a subset of our MAH virulence hits. We verified that the excision repair  
434 protein UvrB, a probable MFS transporter, and a hypothetical gene located within a  
435 genomic region of several identified virulence genes, are required for full MAH  
436 virulence. UvrB has previously been implicated in mycobacterial virulence [57],  
437 while the MFS transporter (*mav\_1005*) and the hypothetical gene (*mav\_4160*) were  
438 first validated as mycobacterial virulence factors by us. Of the six other virulence  
439 genes identified (based on MAH and *Mtb* screening) in the immediate vicinity of  
440 *mav\_4160*, two encode hypothetical proteins, one a hydroxylase, one RNA helicase E  
441 (RhIE), one isochorismate synthase (EntC) and one phosphoglycerate mutase (Gmp2)  
442 (Fig. 6E). EntC was shown to be required for siderophore production in *M. smegmatis*  
443 [69], and might thus play a role in iron acquisition during infection. However, the

444 mechanism of the MFS transporter, as well as *mav\_4160* and the surrounding genes,  
445 in mycobacterial virulence remain to be elucidated.

446 *Mav* isolates exhibit high genetic variation [14, 42, 70, 71]. In accordance, we  
447 registered several large-scale insertions and deletions when we compared the genomic  
448 sequence of MAH 11 to MAH 104. The movement of genetic material between  
449 organisms is mediated by, among other mechanisms, phage transduction, natural  
450 transformation, and plasmid conjugation [72]. The cause (and effect) of *Mav* genomic  
451 plasticity is largely unknown. However, recently, mycobacterial conjugative plasmids  
452 have been identified, also in *Mav* [49, 50]. Interestingly, one of MAH 11's plasmids,  
453 pMD2, is almost identical to previously described *Mav* plasmid pMA100 [49].  
454 pMA100 was shown to transfer via conjugation between the slow growing  
455 mycobacteria *Mav* and *M. kansasii* in a mixed infection patient [49]. pMD2 might  
456 thus partake in genetic exchange between MAH 11 and other mycobacteria.

457 In conclusion, we identified a highly transformable MAH strain susceptible to  
458  $\phi$ MycoMarT7-mediated transposon mutagenesis. This strain enabled genome-wide  
459 identification of *in vitro* essential and virulence genes in this species. Based on our  
460 screens, we identified growth and virulence genes specific to MAH, as well as shared  
461 with *Mtb*. MAH-specific genes might be excellent targets for MAC disease control,  
462 while shared genes might target related mycobacterial diseases as well. We validated  
463 two novel MAH genes required for infection. Since MAH 11 is used as a screening  
464 strain in mycobacterial drug discovery programs [36, 37], a comprehensive  
465 understanding of the genetic requirement for growth and infection of this strain is a  
466 direct asset for current initiatives towards new anti-mycobacterial therapies.

467

468 **Materials and methods**

469 **Strains and growth conditions.** MAH strains used in this study were MAH 104 and  
470 MAH 11 (NCBI GenBank accession number CP000479 and NBAW000000000,  
471 respectively). MAH strains were cultured in Middlebrook 7H9 (BD Difco)  
472 supplemented with 0.2% glycerol, 0.05% Tween 80 and 10% ADC (50 g BSA  
473 fraction V, 20 g dextrose, 8.5 g NaCl, 0.03 g catalase, dH<sub>2</sub>O up to 1 L) for liquid  
474 growth and in Middlebrook 7H10 (BD Difco) supplemented with 0.5% glycerol and  
475 10% ADC for solid growth. For selection of transposon mutants, 20 µg/ml kanamycin  
476 and 0.1% Tween 80 was added to the 7H10 agar plate, the latter to simplify library  
477 harvest.

478

479 **Genome sequencing and annotation.** DNA from late log phase cultures of MAH 11  
480 was extracted using a Masterpure DNA Purification kit (Epicentre), prepared using  
481 the TruSeq genome DNA sample preparation kit (Illumina, Inc.), and sequenced on an  
482 Illumina HiSeq 2500 instrument in paired-end mode with a read length of 125 bp.  
483 The genome sequence was assembled using a comparative assembly method, using  
484 MAH 104 as a reference sequence. SNPs were identified from mapped reads, which  
485 were aligned to the reference sequence using BWA [73] allowing up to 5/125  
486 mismatches, and insertions/deletions (indels) were detected and repaired using local  
487 contig-building (as described in [74]). In addition, large-scale insertions and plasmid  
488 sequences were assembled de novo using Newbler (Roche, Inc.), and integrated into  
489 the genome where connectivity was supported by evidence from paired reads. The  
490 genome was annotated using PGAP [48], the NCBI Prokaryotic Genome Annotation  
491 Pipeline, which employs GeneMarkS+ to identify ORFs (along with RNAs and  
492 pseudo-genes) and assigns putative functions and gene identification based on  
493 homology. The sequences have been deposited in NCBI Genbank with accession

494 numbers NBAW00000000 (aviumMD30 assembly of MAH 11), CM009838.1  
495 (pMD1) and CM009839.1 (pMD2). aviumMD30 is the assembly and annotation  
496 analyzed in this paper. For genome completion, the MAH 11 strain was re-sequenced  
497 on a PacBio Sequel instrument. A total of 650Mb of long reads (up to 40kb) was  
498 collected. There were 130,570 subreads, with a mean read length of 4,937. Reads  
499 were mapped to the aviumMD30 assembly using blasr (version 5.3.2) [75]. Coverage  
500 of aligned segments was tabulated at each site. The PacBio data was used to confirm  
501 the connectivity of the genome by showing that all sites with low coverage (0-10x) in  
502 the Illumina data were spanned by PacBio reads, verifying that the chromosome  
503 consists of a single 5.1Mb contig. Similarly, the PacBio reads were aligned to the  
504 plasmid sequences pMD1 and pMD2 to confirm their continuity as circular, extra-  
505 chromosomal DNA. The updated assembly of the MAH 11 genome sequence  
506 (aviumMD36) is deposited in Genbank under accession number CP035744.

507

508 **Transformation.** Competent MAH cells were prepared as previously optimized for  
509 *Mav* [33]. 100  $\mu$ l of competent cells was electroporated with 2  $\mu$ g plasmid DNA  
510 (pMSP12::*cfp*, kind gift from Christine Cosma and Lalita Ramakrishnan [76]) in a 2  
511 mm cuvette at settings 2.5 kV, 1000 ohm, and 25  $\mu$ F. Cells were recovered overnight  
512 and plated at serial dilutions for colony forming unit (CFU) counts. CFU counts of  
513 pMSP12::*cfp*-transformed bacteria selected on 7H10 with 20  $\mu$ g/ml kanamycin were  
514 normalized to the CFU counts of transformed bacteria titered on 7H10 without  
515 antibiotics.

516

517 **Growth curves.** MAH wt and mutants were grown in 7H9 medium until they reached  
518 stationary phase, then diluted to OD<sub>600</sub> 0.02 in triplicates of 200  $\mu$ l 7H9 medium in

519 microplate honeycomb wells (Oy Growth Curves Ab Ltd.). The growth was  
520 monitored over the course of 10 days in a Bioscreen growth curve reader (Oy Growth  
521 Curves Ab Ltd.), shaking at 37 °C.

522

523 **Generation of MAH transposon mutant library.** The MAH high-density  
524 transposon mutant library was prepared using  $\phi$ MycoMarT7 as previously described  
525 for *Mtb* [77], with the exceptions of growing the bacterial culture to stationary as  
526 opposed to exponential phase prior to transduction. The amount of  $\phi$ MycoMarT7  
527 added for transduction was increased coordinately with the increased bacterial  
528 density. Both the phagestock and bacterial culture were heated to 37°C before  
529 transduction. The library was incubation at 37°C on 7H10 plates with Tween 80  
530 (0.1%) and kanamycin (20  $\mu$ g/ml) for 2-3 weeks.

531

532 **Transposon insertion sequencing (TnSeq).** The transposon library was harvested  
533 and pooled by scraping 7H10 plates with 170 000 colonies. Total DNA was purified  
534 using Masterpure DNA Purification kit (Epicentre), and prepared for TnSeq by PCR  
535 amplification of transposon:genome junctions and adapter ligation following the  
536 protocol in [53] . The samples were sequenced on an Illumina GAII instrument,  
537 collecting around 10 million 54 bp paired-end reads per sample. The reads were  
538 processed using TPP in Transit [54], which counts reads mapping to each TA  
539 dinucleotide site (after eliminating reads sharing the same template barcode; [53]).

540

541 **MAH *in vitro* essential gene set.** Essential genes were identified using a Hidden  
542 Markov Model (HMM, [78]), incorporated into Transit [54]. The HMM is a Bayesian  
543 statistical model that parses the genome into contiguous regions labeled as one of 4

544 states - essential (ES), non-essential (NE), growth-defect (GD, suppressed insertion  
545 counts), or growth-advantaged (GA, insertion counts higher than average) - based on  
546 local insertion density and mean read count at TA sites. The output of the HMM was  
547 processed by labeling each gene with the majority state among the TA sites spanned  
548 by it.

549

550 **Mouse infection.** For MAH 104 and MAH 11 infection experiments, groups of four  
551 C57BL/6 mice were infected *intraperitoneally* with  $5 \times 10^7$  CFU/mouse as previously  
552 described [12]. On day 22 and day 50 post infection, MAH-specific effector T cell  
553 responses and bacterial load were analyzed. Numbers of CFUs per gram organ were  
554 measured by plating serial dilutions of spleen and liver homogenates on 7H10 plates.  
555 For the virulence gene screen, six mice were infected *intraperitoneally* with  $6 \times 10^7$   
556 CFU/mouse of the MAH 11 transposon mutant library. After 22 days of infection,  
557 mice were sacrificed and the liver and spleen were harvested, homogenized and plated  
558 on 7H10 (livers and spleens from two mice were pooled to make one library, resulting  
559 in three liver and three spleen libraries in total from the six mice). After 2-3 weeks at  
560  $37^\circ\text{C}$ , the colonies were scraped and DNA prepared for sequencing as described  
561 above for TnSeq. For *in vivo* validation experiments of virulence genes, groups of 4-5  
562 C57BL/6 mice were infected *intraperitoneally* with (approximately)  $7.5 \times 10^7$   
563 CFU/mouse MAH 11 wt or MAH 11 transposon insertion mutants. On day 26 post  
564 infection, bacterial load in liver and spleen, MAH-specific effector T cell responses,  
565 cytokine levels in organs and serum and histopathology were analyzed.

566

567 **MAH-specific T cell response.** Isolated splenocytes from infected mice were  
568 stimulated overnight with MAH (MOI 3:1); protein transport inhibitor cocktail

569 (eBioscience) was added for the last 4h of incubation. Unstimulated cells were used  
570 as controls. Cells were harvested and stained with Fixable Viability Dye eFluor 780  
571 (eBioscience) and fluorescence-labelled monoclonal antibodies against CD3 (FITC,  
572 eBioscience) and CD4 (Alexa Fluor700 or Brilliant Violet 605, both from  
573 BioLegend). After fixation and permeabilization, intracellular cytokine staining was  
574 performed with fluorescent monoclonal antibody against IFN $\gamma$  (Phycoerythrin,  
575 eBioscience) and TNF $\alpha$  (Allophycocyanin, BioLegend). Cells were analyzed by flow  
576 cytometry on a BD LSR II flow-cytometer (BD Biosciences) and data subsequently  
577 analyzed with FlowJo (FlowJo, LLC) and GraphPad Prism (GraphPad Software, Inc.)  
578 software. Frequencies of IFN $\gamma$ - and TNF $\alpha$ -producing CD4 $^{+}$  effector T cells were  
579 analyzed from FSC/SSC-gated, viable CD3 $^{+}$ CD4 $^{+}$  T cells. The method is described  
580 in further detail in [12].

581

582 **Cytokine measurements.** IL-1 $\beta$ , IFN- $\gamma$  and TNF- $\alpha$  levels were analyzed in serum as  
583 well as spleen and liver homogenates from infected mice using a custom-made  
584 ProcartaPlex immunoassay panel (Affimetrix, eBioscience) according to the  
585 manufacturer's protocol.

586

587 **Histopathology.** Standard hematoxylin & eosin staining of spleen and liver sections  
588 was performed at the Cellular and Molecular Imaging Core Facility (CMIC) at  
589 NTNU as described previously [12]. Images were acquired with a Nikon E400  
590 microscope and NIS-Elements BR imaging software (Nikon Instruments, Melville,  
591 NY, USA).

592



593 **MAH virulence gene set.** For comparative analysis between the *in vitro*-selected and  
594 the *in vivo* (mouse infection)-selected transposon libraries, the TRANSIT-  
595 incorporated ‘resampling’ algorithm was used [54]. Resampling is analogous to a  
596 permutation test, examining if the sum of transposon insertion read counts differs  
597 significantly between conditions.

598

599 **Bulk-identification of transposon insertion sites in the organized MAH library.**

600 *Organizing, pooling and sequence-tagging the library.* 9216 colonies were picked and  
601 transferred to 24 384-well plates in duplicate using a Genetix QPixII colony picker  
602 and software QSoft XP Picking. The cultures were incubated at 37°C for 3 weeks.  
603 The library was pooled by plates (24), columns (24) and rows (16), giving a total of  
604 64 culture pools using a Freedom EVO 200 (TECAN) liquid handling robot and  
605 software EVOsim. Of the total 64 pools, each well should be represented three times;  
606 in one plate pool, in one column pool and in one row pool. The various pools were  
607 tagged by ligating barcoded adapters to the DNA fragments after DNA purification.  
608 Barcodes 1-24 represent plates and columns 1-24, while barcodes 1-16 represent rows  
609 1-16 (further details in S1 Materials and Methods and S3 Table).

610 *Analysis of arrayed library of Tn mutants.* The three tagged pools were sequenced  
611 on an Illumina HiSeq 2500 with 125 bp paired-end reads, collecting 3.2-5.3 million  
612 pairs of reads each pool. The genomic portions of the reads (in read 1) were mapped  
613 to TA sites in the MAH 11 genome (including plasmids) using BWA [73]. The  
614 barcodes (8 bp embedded in read 2) were extracted and tabulated for each insertion  
615 coordinate. Subsequently, a script was written that compared the TA sites represented  
616 by each combination of row-, column-, and plate-barcode to associate each TA site  
617 with the most probable well. The count of each barcode for each site was normalized

618 by dividing by the barcode total over all sites. Barcodes with insufficient counts  
619 (<10,000 total) were excluded from the calculation. Then the relative frequencies of a  
620 plate-, row-, and column-barcodes for each site,  $f_{i,p}^P$ ,  $f_{i,r}^R$ , and  $f_{i,c}^C$  were computed by  
621 dividing by the total abundance of plate-, row-, and column barcodes represented by  
622 the site. Finally, a score  $s(p,r,c) = f_{i,p}^P \cdot f_{i,r}^R \cdot f_{i,c}^C$  was computed for each possible  
623 combination of plate, row-, and column-barcodes that represented the likelihood of  
624 the well assignment for each TA site  $i$ . Wells with high probability ( $s \geq 0.8$  for the  
625 maximal combination) were accepted as unique assignments; wells with  $s < 0.8$  were  
626 rejected as ambiguous (i.e. potentially mapping to multiple wells).

627

628 **Verification of mutants by PCR and Sanger sequencing.** Total DNA was isolated  
629 using Masterpure Complete DNA Isolation kit (Epicentre). PCR to confirm presence  
630 of transposon was performed using GoTaq® Green Master Mix (Promega) and  
631 primers KanF (TGGATTGCACGCAGGTTCTC) and KanR  
632 (CGTCAAGAAGGCGATAGAAG). Sanger sequencing was performed using gDNA  
633 as template prepared with BigDye Terminator Cycle Sequencing kit v.1.1 (Thermo  
634 Fisher); with 60 rounds cycles of 95°C 30 sec, 52°C 30 sec, 60°C 4 min, and primer  
635 KanSeq2 (CTTCCTCGTGCTTTACGG) reading directly into the gDNA. Samples  
636 were purified using BigDye XTerminator kit (Applied Biosystems) and sequenced on  
637 an ABI130xl.

638

639 **Complementation of transposon insertion mutants.** Plasmids for complementation  
640 of transposon insertion mutations were constructed by cloning the wt version of the  
641 disrupted gene into the mycobacterium-escherichia coli shuttle vector pMV261 ([79])  
642 for constitutive expression. To select for the plasmids upon transformation into the

643 mutated strains, the kanamycin resistance gene from pMV261 was swapped with the  
644 hygromycin resistance gene of pUV15TetORm [80], creating pMV261H.  
645 *b6k05\_04950* and *b6k05\_04945*, *b6k05\_18820*, *b6k05\_12440*, and *b6k05\_13510* were  
646 amplified from the MAH 11 genome and cloned into pMV261H, resulting in plasmids  
647 pMV261H *1005*, pMV261H *4160*, pMV261 *eccA5*, and pMV261 *uvrB*, respectively.  
648 All clonings were performed using Gibson Assembly<sup>®</sup> Master Mix (New England  
649 Biolabs). Primer sequences can be provided upon request. The complementing  
650 plasmids were transformed into their respective MAH 11 mutant, resulting in strains  
651 *1005::tn compl.*, *4160::tn compl.*, *eccA5::tn compl.*, and *uvrB::tn compl.*

652

653 **Ethics statement.** The protocols on animal work were approved by the Norwegian  
654 Animal Research Authorities (Forsøksdyrutvalget, FOTS ID 5955). All procedures  
655 involving mice experiments were carried out in accordance with institutional  
656 guidelines, national legislation and the Directive of the European Convention for the  
657 protection of vertebrate animals used for scientific purposes (2010/63/EU).

658

## 659 **Acknowledgements**

660 We thank Jun-Rong Wei, Jung-Yien Chien and Po-Ren Hsueh for providing clinical  
661 MAH isolates from the National Taiwan University Hospital, the Medical Genetics  
662 Department at St. Olavs Hospital for assistance with Sanger sequencing, the Cellular  
663 and Molecular Imaging Core Facility (CMIC) at NTNU for histopathology staining  
664 and personnel at the Comparative Medicine Core Facility (CoMed) at NTNU for  
665 assistance in animal experiments. CMIC and CoMed are funded by the Faculty of  
666 Medicine and Health Science at NTNU and Central Norway Regional Health  
667 Authority. We acknowledge the help of the Texas A&M Sequencing Center

668 (Genomics & Bioinformatics Service, Dr. Charlie Johnson, director).

669

## 670 **References**

- 671 1. Prevots DR, Marras TK. Epidemiology of human pulmonary infection with  
672 nontuberculous mycobacteria: a review. *Clin Chest Med.* 2015;36(1):13-34.
- 673 2. Turenne CY, Wallace R, Jr., Behr MA. Mycobacterium avium in the  
674 postgenomic era. *Clin Microbiol Rev.* 2007;20(2):205-29.
- 675 3. Rindi L, Garzelli C. Genetic diversity and phylogeny of Mycobacterium avium.  
676 *Infect Genet Evol.* 2014;21:375-83.
- 677 4. Falkinham JO, 3rd. Epidemiology of infection by nontuberculous  
678 mycobacteria. *Clin Microbiol Rev.* 1996;9(2):177-215.
- 679 5. Thomson RM, Yew WW. When and how to treat pulmonary non-tuberculous  
680 mycobacterial diseases. *Respirology.* 2009;14(1):12-26.
- 681 6. Appelberg R. Pathogenesis of Mycobacterium avium infection: typical  
682 responses to an atypical mycobacterium? *Immunol Res.* 2006;35(3):179-90.
- 683 7. Awuh JA, Flo TH. Molecular basis of mycobacterial survival in macrophages.  
684 *Cell Mol Life Sci.* 2017;74(9):1625-48.
- 685 8. Awuh JA, Haug M, Mildenerger J, Marstad A, Do CP, Louet C, et al. Keap1  
686 regulates inflammatory signaling in Mycobacterium avium-infected human  
687 macrophages. *Proc Natl Acad Sci U S A.* 2015;112(31):E4272-80.
- 688 9. Ernst JD. The immunological life cycle of tuberculosis. *Nature Reviews*  
689 *Immunology.* 2012;12(8):581-91.
- 690 10. Gidon A, Asberg SE, Louet C, Ryan L, Haug M, Flo TH. Persistent mycobacteria  
691 evade an antibacterial program mediated by phagolysosomal  
692 TLR7/8/MyD88 in human primary macrophages. *PLoS Pathog.*  
693 2017;13(8):e1006551.
- 694 11. Halaas O, Steigedal M, Haug M, Awuh JA, Ryan L, Brech A, et al. Intracellular  
695 Mycobacterium avium intersect transferrin in the Rab11(+) recycling  
696 endocytic pathway and avoid lipocalin 2 trafficking to the lysosomal  
697 pathway. *J Infect Dis.* 2010;201(5):783-92.
- 698 12. Haug M, Awuh JA, Steigedal M, Frengen Kojen J, Marstad A, Nordrum IS, et al.  
699 Dynamics of immune effector mechanisms during infection with  
700 Mycobacterium avium in C57BL/6 mice. *Immunology.* 2013;140(2):232-43.
- 701 13. Champion PA, Champion MM, Manzanillo P, Cox JS. ESX-1 secreted virulence  
702 factors are recognized by multiple cytosolic AAA ATPases in pathogenic  
703 mycobacteria. *Mol Microbiol.* 2009;73(5):950-62.
- 704 14. Uchiya K, Tomida S, Nakagawa T, Asahi S, Nikai T, Ogawa K. Comparative  
705 genome analyses of Mycobacterium avium reveal genomic features of its  
706 subspecies and strains that cause progression of pulmonary disease. *Sci Rep.*  
707 2017;7.
- 708 15. van Opijnen T, Bodi KL, Camilli A. Tn-seq: high-throughput parallel  
709 sequencing for fitness and genetic interaction studies in microorganisms.  
710 *Nat Methods.* 2009;6(10):767-U21.

- 711 16. Zhang YJJ, Reddy MC, Ioerger TR, Rothchild AC, Dartois V, Schuster BM, et al.  
712 Tryptophan Biosynthesis Protects Mycobacteria from CD4 T-Cell-Mediated  
713 Killing. *Cell*. 2013;155(6):1296-308.
- 714 17. Zhang YJJ, Ioerger TR, Huttenhower C, Long JE, Sasseti CM, Sacchettini JC, et  
715 al. Global Assessment of Genomic Regions Required for Growth in  
716 *Mycobacterium tuberculosis*. *PLoS Pathog*. 2012;8(9).
- 717 18. Griffin JE, Gawronski JD, DeJesus MA, Ioerger TR, Akerley BJ, Sasseti CM.  
718 High-Resolution Phenotypic Profiling Defines Genes Essential for  
719 Mycobacterial Growth and Cholesterol Catabolism. *PLoS Pathog*. 2011;7(9).
- 720 19. Weerdenburg EM, Abdallah AM, Rangkuti F, El Ghany MA, Otto TD, Adroub  
721 SA, et al. Genome-Wide Transposon Mutagenesis Indicates that  
722 *Mycobacterium marinum* Customizes Its Virulence Mechanisms for Survival  
723 and Replication in Different Hosts. *Infect Immun*. 2015;83(5):1778-88.
- 724 20. Wang J, Pritchard JR, Kreitmann L, Montpetit A, Behr MA. Disruption of  
725 *Mycobacterium avium* subsp *paratuberculosis*-specific genes impairs in vivo  
726 fitness. *BMC Genomics*. 2014;15.
- 727 21. Motamedi N, Danelishvili L, Bermudez LE. Identification of *Mycobacterium*  
728 *avium* genes associated with resistance to host antimicrobial peptides. *J Med*  
729 *Microbiol*. 2014;63(Pt 7):923-30.
- 730 22. Li YJ, Danelishvili L, Wagner D, Petrofsky M, Bermudez LE. Identification of  
731 virulence determinants of *Mycobacterium avium* that impact on the ability  
732 to resist host killing mechanisms. *J Med Microbiol*. 2010;59(Pt 1):8-16.
- 733 23. Li Y, Miltner E, Wu M, Petrofsky M, Bermudez LE. A *Mycobacterium avium*  
734 PPE gene is associated with the ability of the bacterium to grow in  
735 macrophages and virulence in mice. *Cell Microbiol*. 2005;7(4):539-48.
- 736 24. Danelishvili L, Wu M, Stang B, Harriff M, Cirillo SL, Cirillo JD, et al.  
737 Identification of *Mycobacterium avium* pathogenicity island important for  
738 macrophage and amoeba infection. *Proc Natl Acad Sci U S A*.  
739 2007;104(26):11038-43.
- 740 25. Bermudez LE, Danelishvili L, Babrack L, Pham T. Evidence for genes  
741 associated with the ability of *Mycobacterium avium* subsp. *hominissuis* to  
742 escape apoptotic macrophages. *Frontiers in cellular and infection*  
743 *microbiology*. 2015;5:63.
- 744 26. Bermudez LE, Rose SJ, Everman JL, Ziaie NR. Establishment of a Host-to-Host  
745 Transmission Model for *Mycobacterium avium* subsp. *hominissuis* Using  
746 *Caenorhabditis elegans* and Identification of Colonization-Associated Genes.  
747 *Frontiers in cellular and infection microbiology*. 2018;8:123.
- 748 27. Rose SJ, Bermudez LE. Identification of Bicarbonate as a Trigger and Genes  
749 Involved with Extracellular DNA Export in Mycobacterial Biofilms. *mBio*.  
750 2016;7(6).
- 751 28. Khattak FA, Kumar A, Kamal E, Kunisch R, Lewin A. Illegitimate  
752 recombination: an efficient method for random mutagenesis in  
753 *Mycobacterium avium* subsp. *hominissuis*. *BMC Microbiol*. 2012;12:204.
- 754 29. Horan KL, Freeman R, Weigel K, Semret M, Pfaller S, Covert TC, et al.  
755 Isolation of the genome sequence strain *Mycobacterium avium* 104 from  
756 multiple patients over a 17-year period. *J Clin Microbiol*. 2006;44(3):783-9.
- 757 30. Uchiya K, Takahashi H, Yagi T, Moriyama M, Inagaki T, Ichikawa K, et al.  
758 Comparative Genome Analysis of *Mycobacterium avium* Revealed Genetic

- 759 Diversity in Strains that Cause Pulmonary and Disseminated Disease. PLoS  
760 One. 2013;8(8).
- 761 31. Rathnaiah G, Bannantine JP, Bayles DO, Zinniel DK, Stabel JR, Grohn YT, et al.  
762 Analysis of Mycobacterium avium subsp. paratuberculosis Mutant Libraries  
763 Reveals Loci-dependent Transposition Biases and Strategies to Novel Mutant  
764 Discovery. Microbiology. 2016.
- 765 32. Sassetti CM, Boyd DH, Rubin EJ. Comprehensive identification of  
766 conditionally essential genes in mycobacteria. Proc Natl Acad Sci U S A.  
767 2001;98(22):12712-7.
- 768 33. Lee SH, Cheung M, Irani V, Carroll JD, Inamine JM, Howe WR, et al.  
769 Optimization of electroporation conditions for Mycobacterium avium.  
770 Tuberculosis. 2002;82(4-5):167-74.
- 771 34. Madiraju MVVS, Qin MH, Yamamoto K, Atkinson MAL, Rajagopalan M. The  
772 dnaA gene region of Mycobacterium avium and the autonomous replication  
773 activities of its 5' and 3' flanking regions. Microbiol-Sgm. 1999;145:2913-  
774 21.
- 775 35. Foleythomas EM, Whipple DL, Bermudez LE, Barletta RG. Phage Infection,  
776 Transfection and Transformation of Mycobacterium-Avium Complex and  
777 Mycobacterium-Paratuberculosis. Microbiol-Sgm. 1995;141:1173-81.
- 778 36. Moreira W, Lim JJ, Yeo SY, Ramanujulu PM, Dymock BW, Dick T. Fragment-  
779 Based Whole Cell Screen Delivers Hits against M-tuberculosis and Non-  
780 tuberculous Mycobacteria. Front Microbiol. 2016;7.
- 781 37. Yang TM, Moreira W, Nyantakyi SA, Chen H, Aziz DB, Go ML, et al.  
782 Amphiphilic Indole Derivatives as Antimycobacterial Agents: Structure-  
783 Activity Relationships and Membrane Targeting Properties. J Med Chem.  
784 2017;60(7):2745-63.
- 785 38. Sassetti CM, Boyd DH, Rubin EJ. Comprehensive identification of  
786 conditionally essential genes in mycobacteria. Proceedings of the National  
787 Academy of Sciences. 2001;98(22):12712-7.
- 788 39. Bardarov S, Kriakov J, Carriere C, Yu S, Vaamonde C, McAdam RA, et al.  
789 Conditionally replicating mycobacteriophages: A system for transposon  
790 delivery to Mycobacterium tuberculosis. Proceedings of the .... 1997.
- 791 40. Pope WH, Ferreira CM, Jacobs-Sera D, Benjamin RC, Davis AJ, DeJong RJ, et al.  
792 Cluster K Mycobacteriophages: Insights into the Evolutionary Origins of  
793 Mycobacteriophage TM4. PLoS One. 2011;6(10):e26750.
- 794 41. Yee M, Klinzing D, Wei JR, Gengenbacher M, Rubin EJ, Chien JY, et al. Draft  
795 Genome Sequence of Mycobacterium avium 11. Genome Announc.  
796 2017;5(32).
- 797 42. Semret M, Zhai G, Mostowy S, Cleto C, Alexander D, Cangelosi G, et al.  
798 Extensive genomic polymorphism within Mycobacterium avium. J Bacteriol.  
799 2004;186(18):6332-4.
- 800 43. Wu CW, Glasner J, Collins M, Naser S, Talaat AM. Whole-genome plasticity  
801 among Mycobacterium avium subspecies: Insights from comparative  
802 genomic hybridizations. J Bacteriol. 2006;188(2):711-23.
- 803 44. Fan XY, Xie LX, Li W, Xie JP. Prophage-like elements present in  
804 Mycobacterium genomes. BMC Genomics. 2014;15.
- 805 45. Ovrutsky AR, Chan ED, Kartalija M, Bai XY, Jackson M, Gibbs S, et al.  
806 Cooccurrence of Free-Living Amoebae and Nontuberculous Mycobacteria in



- 807 Hospital Water Networks, and Preferential Growth of *Mycobacterium avium*  
808 in *Acanthamoeba lenticulata*. *Appl Environ Microbiol.* 2013;79(10):3185-92.
- 809 46. Guerrero C, Bernasconi C, Burki D, Bodmer T, Telenti A. A Novel Insertion  
810 Element from *Mycobacterium-Avium*, Is1245, Is a Specific Target for  
811 Analysis of Strain Relatedness. *J Clin Microbiol.* 1995;33(2):304-7.
- 812 47. Kunze ZM, Wall S, Appelberg R, Silva MT, Portaels F, Mcfadden JJ. Is901, a  
813 New Member of a Widespread Class of Atypical Insertion Sequences, Is  
814 Associated with Pathogenicity in *Mycobacterium-Avium*. *Mol Microbiol.*  
815 1991;5(9):2265-72.
- 816 48. Tatusova T, DiCuccio M, Badretdin A, Chetvernin V, Nawrocki EP, Zaslavsky  
817 L, et al. NCBI prokaryotic genome annotation pipeline. *Nucleic Acids Res.*  
818 2016;44(14):6614-24.
- 819 49. Rabello MCD, Matsumoto CK, de Almeida LGP, Menendez MC, de Oliveira RS,  
820 Silva RM, et al. First Description of Natural and Experimental Conjugation  
821 between *Mycobacteria* Mediated by a Linear Plasmid. *PLoS One.* 2012;7(1).
- 822 50. Ummels R, Abdallah AM, Kuiper V, Aajoud A, Sparrius M, Naeem R, et al.  
823 Identification of a Novel Conjugative Plasmid in *Mycobacteria* That Requires  
824 Both Type IV and Type VII Secretion. *mBio.* 2014;5(5).
- 825 51. Krzywinska E, Bhatnagar S, Sweet L, Chatterjee D, Schorey JS.  
826 *Mycobacterium avium* 104 deleted of the methyltransferase D gene by allelic  
827 replacement lacks serotype-specific glycopeptidolipids and shows  
828 attenuated virulence in mice. *Mol Microbiol.* 2005;56(5):1262-73.
- 829 52. Rubin EJ, Akerley BJ, Novik VN, Lampe DJ, Husson RN, Mekalanos JJ. In vivo  
830 transposition of mariner-based elements in enteric bacteria and  
831 mycobacteria. *Proc Natl Acad Sci U S A.* 1999;96(4):1645-50.
- 832 53. Long JE, DeJesus M, Ward D, Baker RE, Ioerger T, Sasseti CM. Identifying  
833 essential genes in *Mycobacterium tuberculosis* by global phenotypic  
834 profiling. *Methods Mol Biol.* 2015;1279:79-95.
- 835 54. DeJesus MA, Ambadipudi C, Baker R, Sasseti C, Ioerger TR. TRANSIT--A  
836 Software Tool for Himar1 TnSeq Analysis. *PLoS Comput Biol.*  
837 2015;11(10):e1004401.
- 838 55. DeJesus MA, Gerrick ER, Xu W, Park SW, Long JE, Boutte CC, et al.  
839 Comprehensive Essentiality Analysis of the *Mycobacterium tuberculosis*  
840 Genome via Saturating Transposon Mutagenesis. *mBio.* 2017;8(1).
- 841 56. Saunders BM, Cheers C. Inflammatory response following intranasal  
842 infection with *Mycobacterium avium* complex: role of T-cell subsets and  
843 gamma interferon. *Infect Immun.* 1995;63(6):2282-7.
- 844 57. Darwin KH, Nathan CF. Role for nucleotide excision repair in virulence of  
845 *Mycobacterium tuberculosis*. *Infect Immun.* 2005;73(8):4581-7.
- 846 58. Kurtz S, McKinnon KP, Runge MS, Ting JPY, Braunstein M. The SecA2  
847 secretion factor of *Mycobacterium tuberculosis* promotes growth in  
848 macrophages and inhibits the host immune response. *Infect Immun.*  
849 2006;74(12):6855-64.
- 850 59. McKinney JD, Honer zu Bentrup K, Munoz-Elias EJ, Miczak A, Chen B, Chan  
851 WT, et al. Persistence of *Mycobacterium tuberculosis* in macrophages and  
852 mice requires the glyoxylate shunt enzyme isocitrate lyase. *Nature.*  
853 2000;406(6797):735-8.

- 854 60. Kar R, Nangpal P, Mathur S, Singh S, Tyagi AK. bioA mutant of  
855 Mycobacterium tuberculosis shows severe growth defect and imparts  
856 protection against tuberculosis in guinea pigs. PLoS One. 2017;12(6).
- 857 61. Puckett S, Trujillo C, Wang Z, Eoh H, Ioerger TR, Krieger I, et al. Glyoxylate  
858 detoxification is an essential function of malate synthase required for carbon  
859 assimilation in Mycobacterium tuberculosis. Proc Natl Acad Sci U S A.  
860 2017;114(11):E2225-E32.
- 861 62. Mackenzie N, Alexander DC, Turenne CY, Behr MA, De Buck JM. Genomic  
862 comparison of PE and PPE genes in the Mycobacterium avium complex. J Clin  
863 Microbiol. 2009;47(4):1002-11.
- 864 63. Vandewalle K, Festjens N, Plets E, Vuylsteke M, Saeys Y, Callewaert N.  
865 Characterization of genome-wide ordered sequence-tagged Mycobacterium  
866 mutant libraries by Cartesian Pooling-Coordinate Sequencing. Nature  
867 communications. 2015;6.
- 868 64. Truglio JJ, Croteau DL, Van Houten B, Kisker C. Prokaryotic nucleotide  
869 excision repair: The UvrABC system. Chem Rev. 2006;106(2):233-52.
- 870 65. Abdallah AM, Verboom T, Weerdenburg EM, Gey van Pittius NC, Mahasha  
871 PW, Jimenez C, et al. PPE and PE\_PGRS proteins of Mycobacterium marinum  
872 are transported via the type VII secretion system ESX-5. Mol Microbiol.  
873 2009;73(3):329-40.
- 874 66. Bottai D, Di Luca M, Majlessi L, Frigui W, Simeone R, Sayes F, et al. Disruption  
875 of the ESX-5 system of Mycobacterium tuberculosis causes loss of PPE  
876 protein secretion, reduction of cell wall integrity and strong attenuation. Mol  
877 Microbiol. 2012;83(6):1195-209.
- 878 67. Bottai D, Di Luca M, Majlessi L, Frigui W, Simeone R, Sayes F, et al. Disruption  
879 of the ESX-5 system of Mycobacterium tuberculosis causes loss of PPE  
880 protein secretion, reduction of cell wall integrity and strong attenuation. Mol  
881 Microbiol. 2012;83(6):1195-209.
- 882 68. Blumenthal A, Trujillo C, Ehrt S, Schnappinger D. Simultaneous analysis of  
883 multiple Mycobacterium tuberculosis knockdown mutants in vitro and in  
884 vivo. PLoS One. 2010;5(12):e15667.
- 885 69. Nagachar N, Ratledge C. Roles of trpE2, entC and entD in salicylic acid  
886 biosynthesis in Mycobacterium smegmatis. FEMS Microbiol Lett.  
887 2010;308(2):159-65.
- 888 70. Oliveira RS, Sircili MP, Oliveira EMD, Balian SC, Ferreira-Neto JS, Leao SC.  
889 Identification of Mycobacterium avium genotypes with distinctive traits by  
890 combination of IS1245-based restriction fragment length polymorphism and  
891 restriction analysis of hsp65. J Clin Microbiol. 2003;41(1):44-9.
- 892 71. Kannan N, Lai YP, Haug M, Lilleness MK, Bakke SS, Marstad A, et al. Genetic  
893 variation/evolution and differential host responses resulting from in-patient  
894 adaptation of Mycobacterium avium. Infect Immun. 2019.
- 895 72. Soucy SM, Huang JL, Gogarten JP. Horizontal gene transfer: building the web  
896 of life. Nat Rev Genet. 2015;16(8):472-82.
- 897 73. Li H, Durbin R. Fast and accurate short read alignment with Burrows-  
898 Wheeler transform. Bioinformatics. 2009;25(14):1754-60.
- 899 74. Ioerger TR, Feng YC, Ganesula K, Chen XH, Dobos KM, Fortune S, et al.  
900 Variation among Genome Sequences of H37Rv Strains of Mycobacterium  
901 tuberculosis from Multiple Laboratories. J Bacteriol. 2010;192(14):3645-53.



- 902 75. Chaisson MJ, Tesler G. Mapping single molecule sequencing reads using basic  
903 local alignment with successive refinement (BLASR): application and theory.  
904 BMC Bioinformatics. 2012;13:238.
- 905 76. Cosma CL, Humbert O, Ramakrishnan L. Superinfecting mycobacteria home  
906 to established tuberculous granulomas. Nat Immunol. 2004;5(8):828-35.
- 907 77. Majumdar G, Mbau R, Singh V, Warner DF, Dragset MS, Mukherjee R.  
908 Genome-Wide Transposon Mutagenesis in Mycobacterium tuberculosis and  
909 Mycobacterium smegmatis. Methods Mol Biol. 2017;1498:321-35.
- 910 78. DeJesus MA, Ioerger TR. A Hidden Markov Model for identifying essential  
911 and growth-defect regions in bacterial genomes from transposon insertion  
912 sequencing data. BMC Bioinformatics. 2013;14:303.
- 913 79. Stover CK, de la Cruz VF, Fuerst TR, Burlein JE, Benson LA, Bennett LT, et al.  
914 New use of BCG for recombinant vaccines. Nature. 1991;351(6326):456-60.
- 915 80. Ehrt S, Guo XV, Hickey CM, Ryou M, Monteleone M, Riley LW, et al.  
916 Controlling gene expression in mycobacteria with anhydrotetracycline and  
917 Tet repressor. Nucleic Acids Res. 2005;33(2):e21.
- 918 81. Treangen TJ, Messeguer X. M-GCAT: interactively and efficiently constructing  
919 large-scale multiple genome comparison frameworks in closely related  
920 species. BMC Bioinformatics. 2006;7:433.
- 921 82. Hulsen T, de Vlieg J, Alkema W. BioVenn - a web application for the  
922 comparison and visualization of biological lists using area-proportional Venn  
923 diagrams. BMC Genomics. 2008;9.

924

## 925 **Supporting information**

926 **S1 Fig. Verification of transposon insertions.** 10 colonies were picked from a plated  
927 MAH library and subjected to PCR using primers specific for the *HimarI* transposon.  
928 Positive control (pos ctrl) was  $\phi$ MycoMarT7, negative control (neg ctrl) was un-  
929 transduced MAH 11. Colony number 4 gave a band in the expected size when  
930 resubjected to PCR.

931

932 **S2 Fig. MAH phylogenetic tree.** A phylogenetic tree containing MAH 11, MAH 104  
933 and 19 other *M. avium* strains was constructed using PHYLIP. The subspecies MAH,  
934 MAA, and MAP, were confirmed by their hsp60 sequence.

935

936 **S3 Fig. MAH cell wall integrity assay.** Sensitivity to SDS was assessed by spotting  
937 dilutions of MAH 104 and MAH 11 (and transposon mutants) on 7H10 plates  
938 prepared with or without 0.01% SDS.

939

940 **S4 Fig. Cytokine production during MAH 11 mouse infection.** Mice were infected  
941 for 26 days with MAH 11 wt or MAH 11 transposon insertion mutants with and  
942 without complementation. Levels of IL-1 $\beta$  (A), TNF $\alpha$  (B) and IFN $\gamma$  (C) were  
943 analyzed in spleen and liver homogenates and serum. Data show mean  $\pm$  SEM of  
944 three or four infected mice in each group. The dotted line represents the cytokine level  
945 of uninfected mice.

946

947 **S5 Fig. Histopathology during MAH 11 mouse infection.** Mice were infected with  
948 MAH 11 wt or MAH 11 transposon insertion mutants with and without  
949 complementation. After 26 days, hematoxylin & eosin staining was performed on  
950 spleen and liver sections. The panel shows representative 10x and 40x magnification  
951 images of spleen and liver from one out of three or four infected mice in each group.

952

953 **S6 Fig. Mouse infection with MAH 11 *eccA5::tn* ESX-5 mutant.** Mice were  
954 infected with MAH 11 wt or *eccA5::tn* mutant with and without complementation (4  
955 mice in each group). After 26 days of infection, the bacterial burden in spleen (A) and  
956 liver (B) was determined by CFUs per gram organ. (C and D) MAH-specific CD4 $^{+}$  T  
957 cell response in mice infected for 26 days with MAH 11 wt or *eccA5::tn* mutant with  
958 and without complementation. Splenocytes from all mice in each group were  
959 stimulated with MAH overnight and frequencies of IFN $\gamma$ - (C) and TNF $\alpha$ - (D)  
960 producing CD4 $^{+}$  T helper cells were determined by flow-cytometry. Data show mean

961 ± SEM. \*  $P \leq 0.05$ ; unpaired students *t* test, two-tailed, compared to wt. (E) *in vitro*  
962 growth (7H9 medium) of MAH 11 wt and eccA5::tn mutant with and without  
963 complementation. Data show mean ± SEM of three replicate samples per condition.

964 The results are representative of three independent experiments.

965

966 **S1 Table. Output statistics for the sequenced MAH libraries.**

967

968 **S2 Table. Verification of transposon insertion sites by Sanger sequencing.**

969

970 **S3 Table. Adapters used in TnSeq of the organized MAH library.**

971

972 **S1 Materials and Methods. Bulk-identification of transposon insertion sites in an**  
973 **organized MAH library.**

974

975 **S1 Datasets (A-O)**

976 A – MAH 104 and MAH 11 mutual orthologs.

977 B – MAH 11 *in vivo* genetic requirement and MAH 11 and *Mtb* mutual orthologs.

978 C – MAH 11 and *Mtb* best orthologs.

979 D – Plasmid pMD1 annotation.

980 E – Plasmid pMD2 annotation.

981 F – pMA100 and pMD2 mutual orthologs.

982 G – MAH 11 *in vitro* genetic requirement.

983 H – pMD1 *in vitro* genetic requirement.

984 I – pMD2 *in vitro* genetic requirement.

985 J – pMD1 (spleen) *in vivo* genetic requirement.

- 986 K – pMD1 (liver) *in vivo* genetic requirement.  
987 L – pMD2 (spleen) *in vivo* genetic requirement.  
988 M – pMD2 (liver) *in vivo* genetic requirement.  
989 N – Location of transposons in MAH 11 organized library.  
990 O – Map of mutants/well in MAH 11 organized library.

991

## 992 **Figure legends**

993 **Fig 1: The experimental setup of the study.** An MAH transposon mutant library of  
994 170 000 mutants (~66% coverage) was generated by selection on 7H10 agar medium.  
995 This library was further subjected to mouse infection or organized mutant-by-mutant  
996 in 384-well plates (24 plates). By TnSeq of the *in vitro*-selected (7H10), *in vivo*-  
997 selected (C57BL/6 mice), and the organized library, the MAH essential- and virulence  
998 gene sets were defined, and the location of ~3500 organized mutants were identified.  
999 The output from the *in vitro* selected TnSeq'ed library was used to identify virulence  
1000 genes (dashed line). Finally, a subset of virulence gene hits was validated by mouse  
1001 infection experiments. Tn, transposon.

1002

1003 **Fig 2: Distribution of transposon insertion counts.** Transposon insertion counts  
1004 across the MAH 11 genome (A) and the two plasmids, pMD1 (B) and pMD2 (C). The  
1005 height of the black bars represents the number of insertion counts at the respective  
1006 genome site.

1007

1008 **Fig 3: Synteny plot.** (A) Plot of synteny between MAH MD (top) and MAV 104  
1009 (bottom), made with M-GCAT [81]. (B) The largest (>40kb) insertions and deletions  
1010 in MAH 11 relative to MAH 104.

1011

1012 **Fig 4: The MAH *in vitro* essential and *in vivo* virulence gene sets.** (A) MAH 11  
1013 and MAH 104 transformation frequencies. Data show mean  $\pm$  SEM of three  
1014 individually electroporated samples. The result is representative of two independent  
1015 experiments. (B) Number of MAH 11 genes defined as essential, growth defect,  
1016 growth advantage and non-essential. (C) Venn diagram showing degree of overlap  
1017 between MAH 11 and *Mtb* mutual orthologs (grey), MAH 11 *in vitro* essential genes  
1018 as defined in this study (red), and *Mtb in vitro* essential genes (blue) as defined by  
1019 DeJesus *et al.* [55]. (D) Venn diagram showing degree of overlap between MAH 11  
1020 and *Mtb* mutual orthologs (grey), MAH 11 virulence genes as defined in this study  
1021 (red), and *Mtb* virulence genes (blue) as defined by Zhang *et al.* [16]. The Venn  
1022 diagrams were created using Biovenn [82].

1023

1024 **Fig 5: MAH 11 and MAH 104 mouse model infection.** Bacterial burden in spleen  
1025 (A) and liver (B) of mice after 22 and 50 days of infection with MAH 104 and MAH  
1026 11. Data show mean  $\pm$  SEM of four infected mice in each group. (C) MAH 104 and  
1027 MAH 11 *in vitro* growth (7H9 medium). Data show mean  $\pm$  SEM of three replicate  
1028 samples per condition. The result is representative of two independent experiments.  
1029 (D) Frequencies of MAH-specific CD4<sup>+</sup> T cells after 22 and 50 days of MAH 104  
1030 and MAH 11 infection. Splenocytes from all mice were stimulated overnight with  
1031 MAH and frequencies of IFN $\gamma$ -producing CD4<sup>+</sup> effector T cells were analyzed by  
1032 flow-cytometry. Data show mean  $\pm$  SEM of four infected mice per group. Mice  
1033 experiments are representative of two independent experiments (for 50 day time  
1034 point).

1035

1036 **Fig 6: Validation of virulence genes.** Mice were infected with MAH 11 wt or MAH  
1037 11 transposon insertion mutants with and without complementation. After 26 days of  
1038 infection, the bacterial burden in spleen (A) and liver (B) was determined by CFUs  
1039 per gram organ. Data show mean  $\pm$  SEM of three or four infected mice in each group.  
1040 \*,  $P \leq 0.05$ ; Mann Whitney U test, one-tailed, mutant compared to wt (blue asterisk) or  
1041 mutant compared to complemented mutant (red asterisk). (C and D) MAH-specific  
1042 CD4<sup>+</sup> effector T cell response in mice infected with MAH 11 wt or MAH 11  
1043 transposon insertion mutants. 26 days post infection, splenocytes from all mice in  
1044 each group were stimulated with MAH overnight and frequencies of IFN $\gamma$ -producing  
1045 (C) and TNF $\alpha$ -producing (D) CD4<sup>+</sup> T helper cells were determined by flow-  
1046 cytometry. Data show mean  $\pm$  SEM. \*  $P \leq 0.05$ , \*\*  $P \leq 0.01$ , and \*\*\*  $P \leq 0.001$ ;  
1047 unpaired students *t* test, two-tailed, compared to wt. (E) *in vitro* growth (7H9  
1048 medium) of MAH 11 wt and transposon insertion mutants with and without  
1049 complementation. Data show mean  $\pm$  SEM of three replicate samples per condition.  
1050 The results are representative of three independent experiments. (F) Genetic region  
1051 spanning from *mav\_4154-4163*. Hits from our virulence screen (*mav\_41xx*) and  
1052 previously published *Mtb* virulence screen (Rv32xx) [16] are shown in bold red.

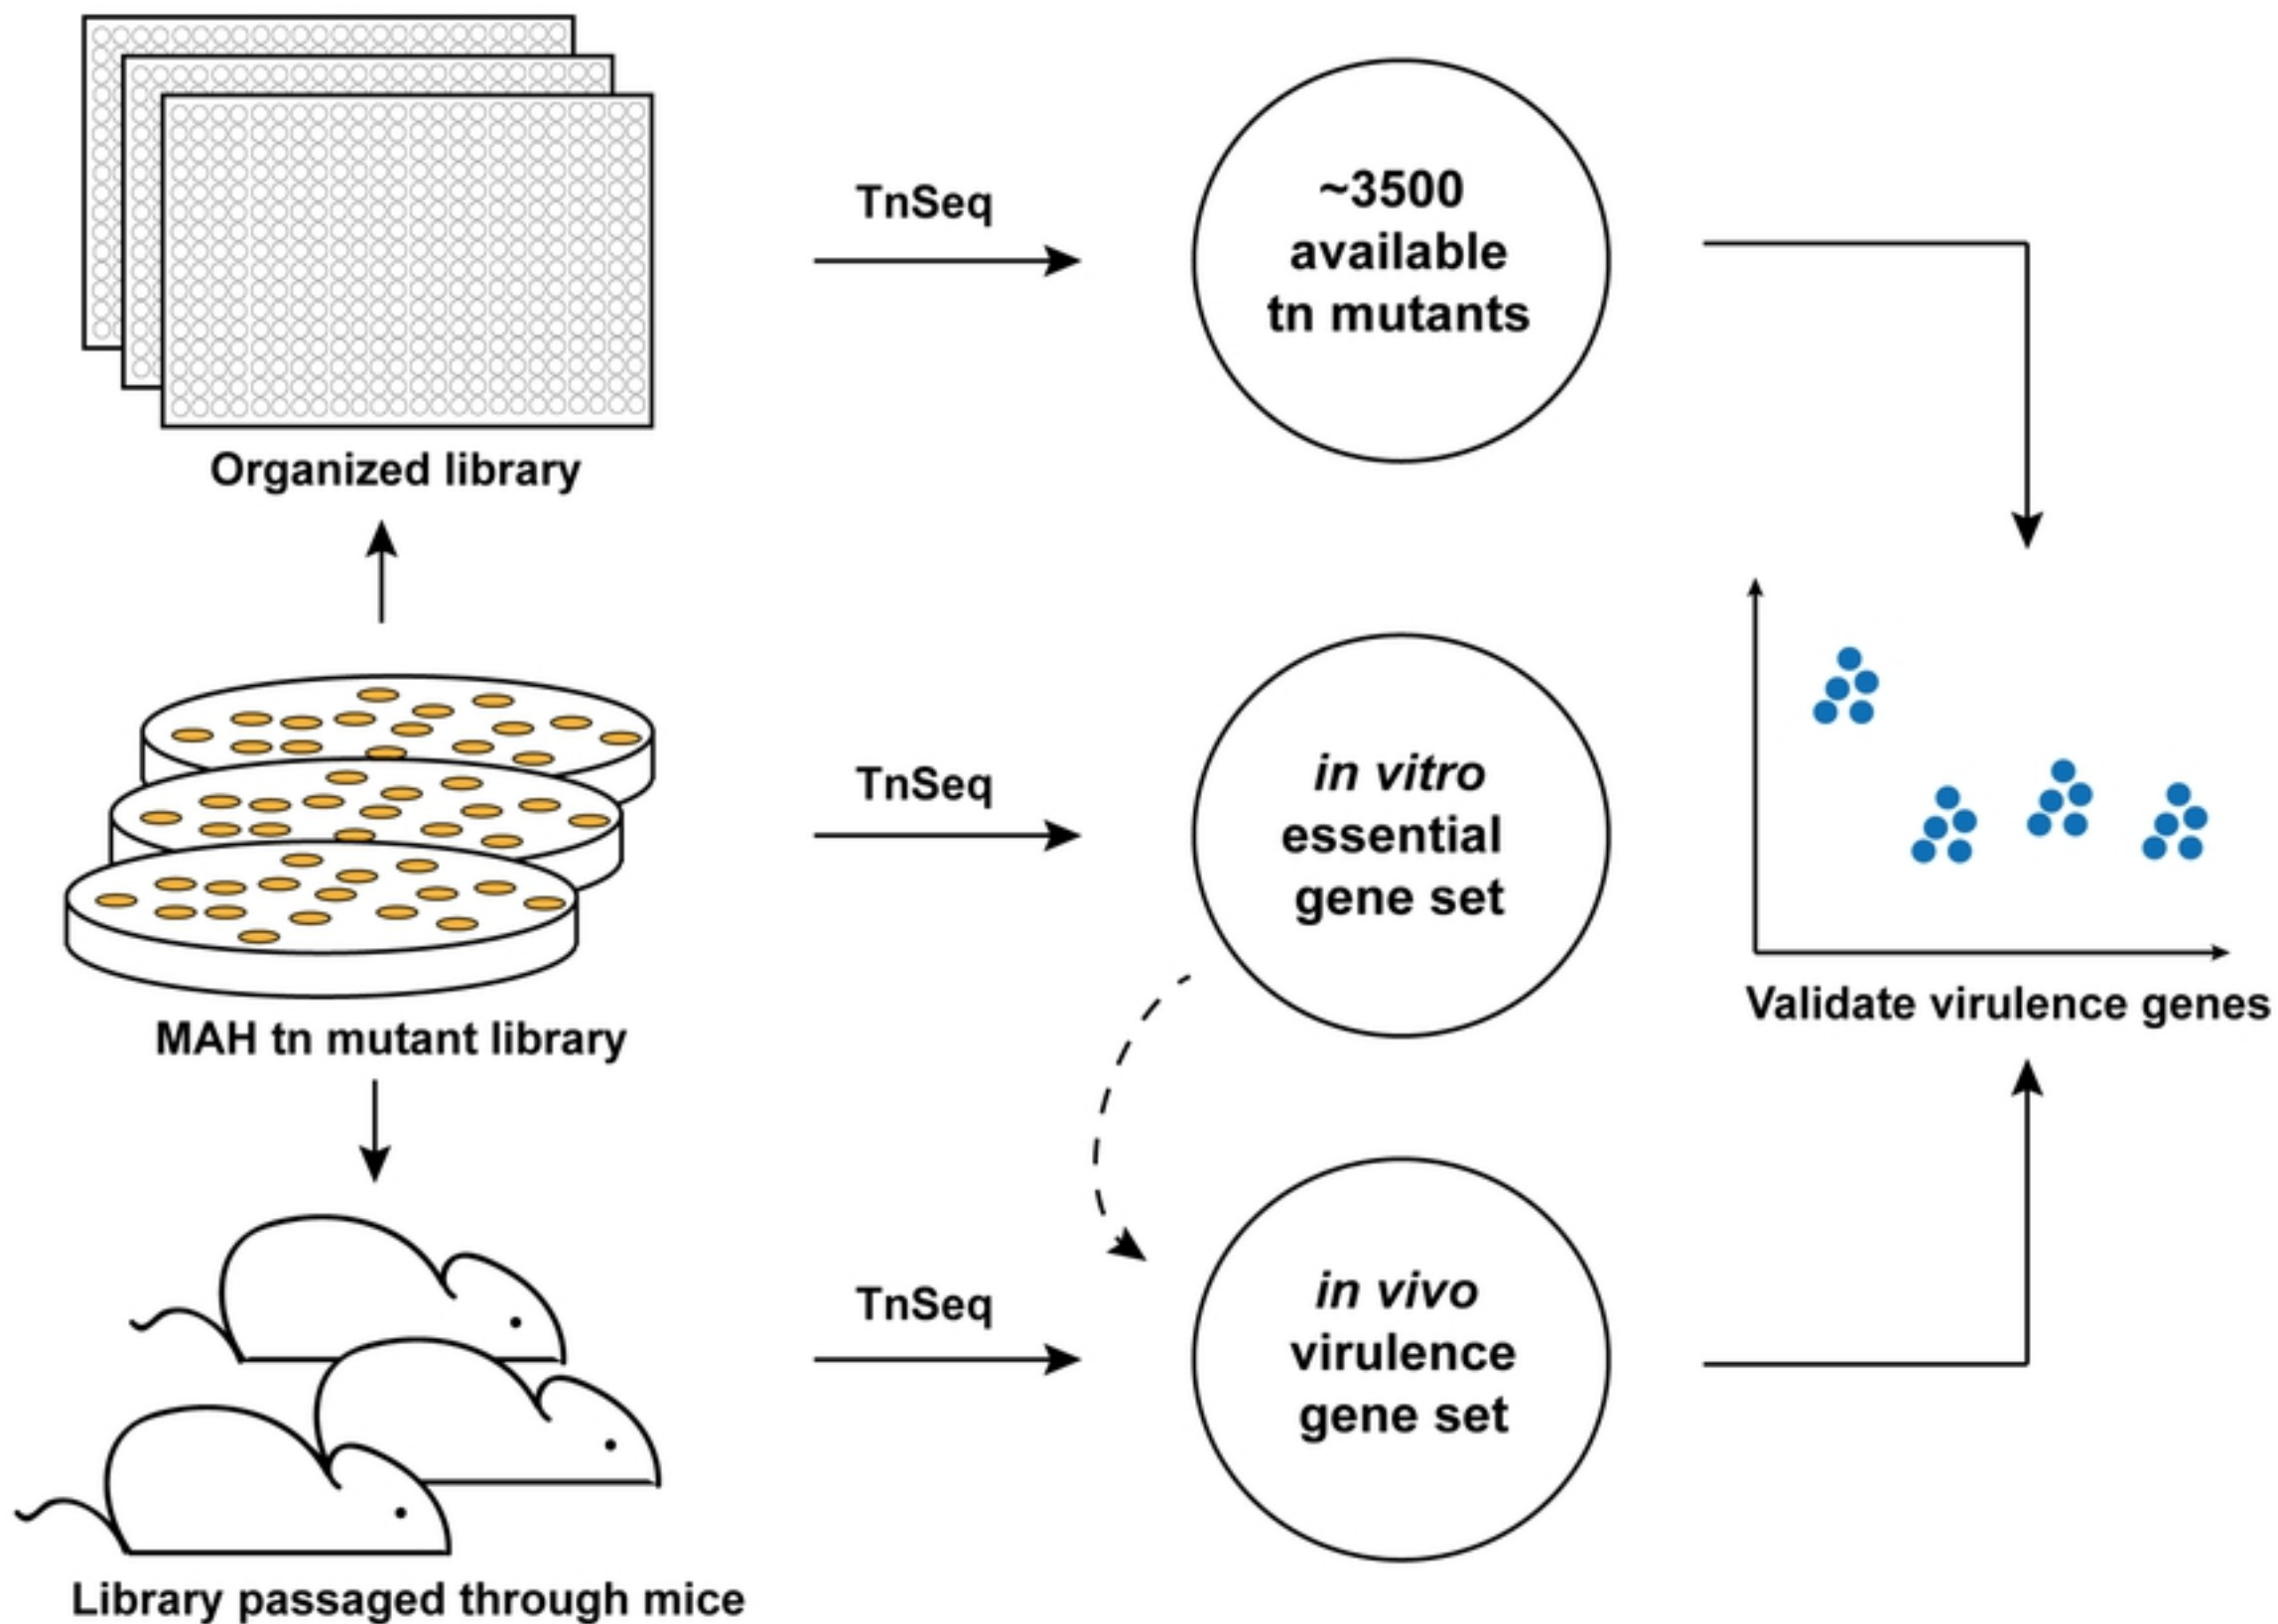

Figure 1



**A**

MAH 11 (aviumMD30 assembly)

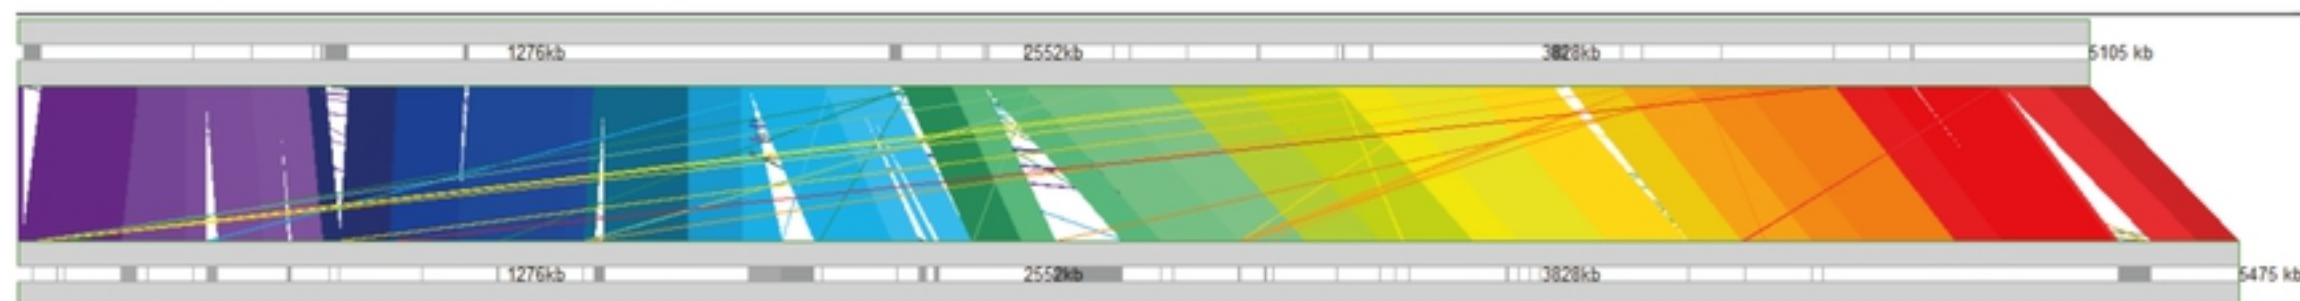**B**

MAH 104

|                                    | annotation          | coordinates (in MAH 11) | size (bp) |
|------------------------------------|---------------------|-------------------------|-----------|
| <i>deletions in MAH 11</i>         |                     |                         |           |
| MAV_0253-MAV_0299 (46 genes)       | LSP3                | 293034                  | 40,100    |
| MAV_1806-MAV_1974 (168 genes)      | LSP4                | 1800387                 | 162,713   |
| MAV_2518-MAV-2691 (174 genes)      | LSP1                | 2378550                 | 173,202   |
| MAV_5026-MAV_5107 (82 genes)       | LSP6                | 4888896                 | 81,635    |
| <i>insertions in MAH 11</i>        |                     |                         |           |
| BK065_00050-BK065_00255 (37 genes) | hypotheticals, IS's | 11154-57064             | 45,910    |
| BK065_03885-BK065_04170 (48 genes) | metabolic genes     | 756785-814220           | 57,435    |
| BK065_17725-BK065_18015 (56 genes) | new prophage        | 3779806-3821237         | 41,431    |

Figure 3

A

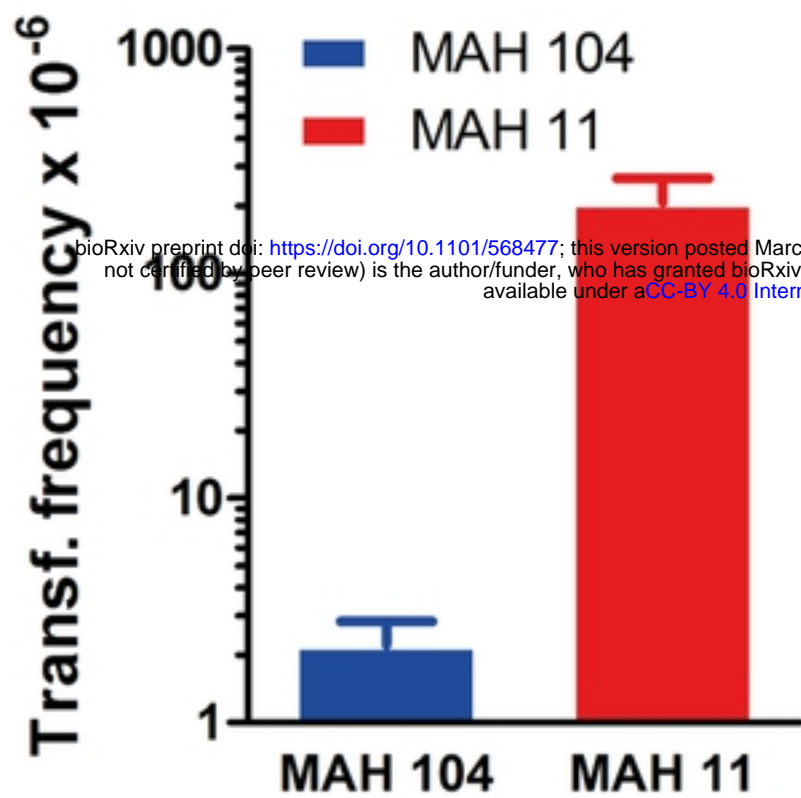

B

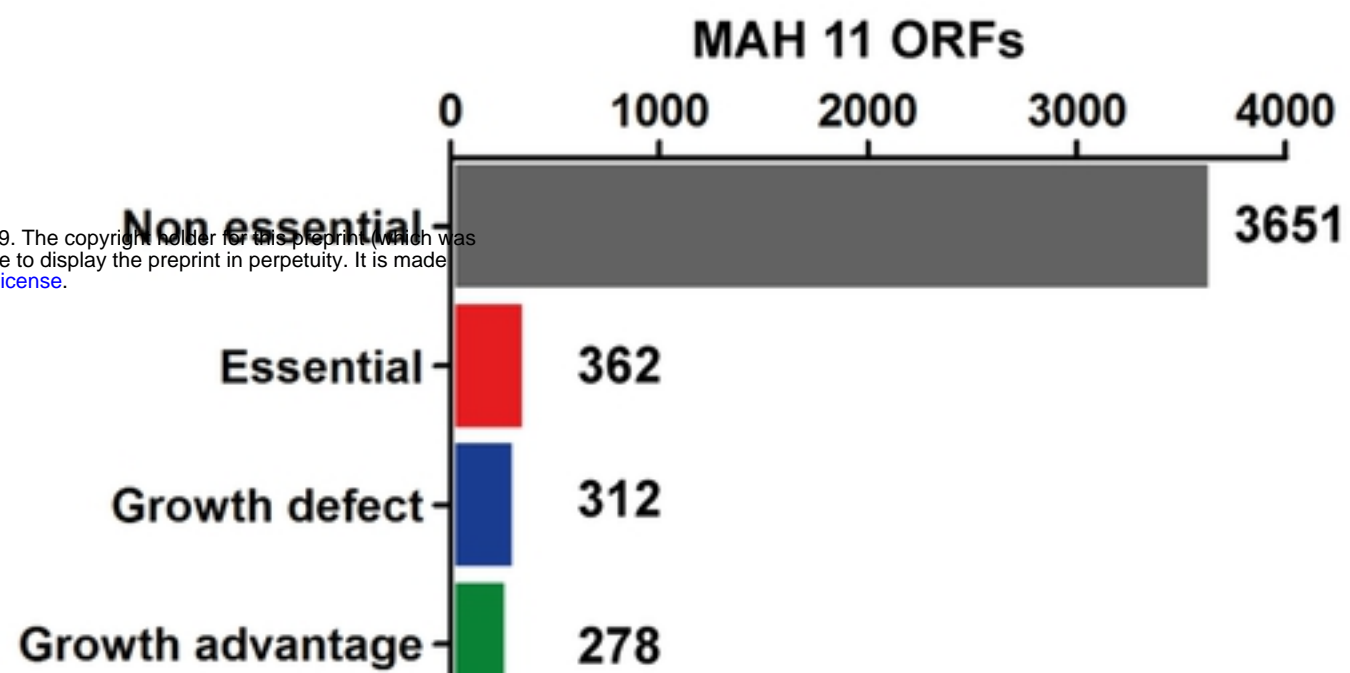

C

*in vitro*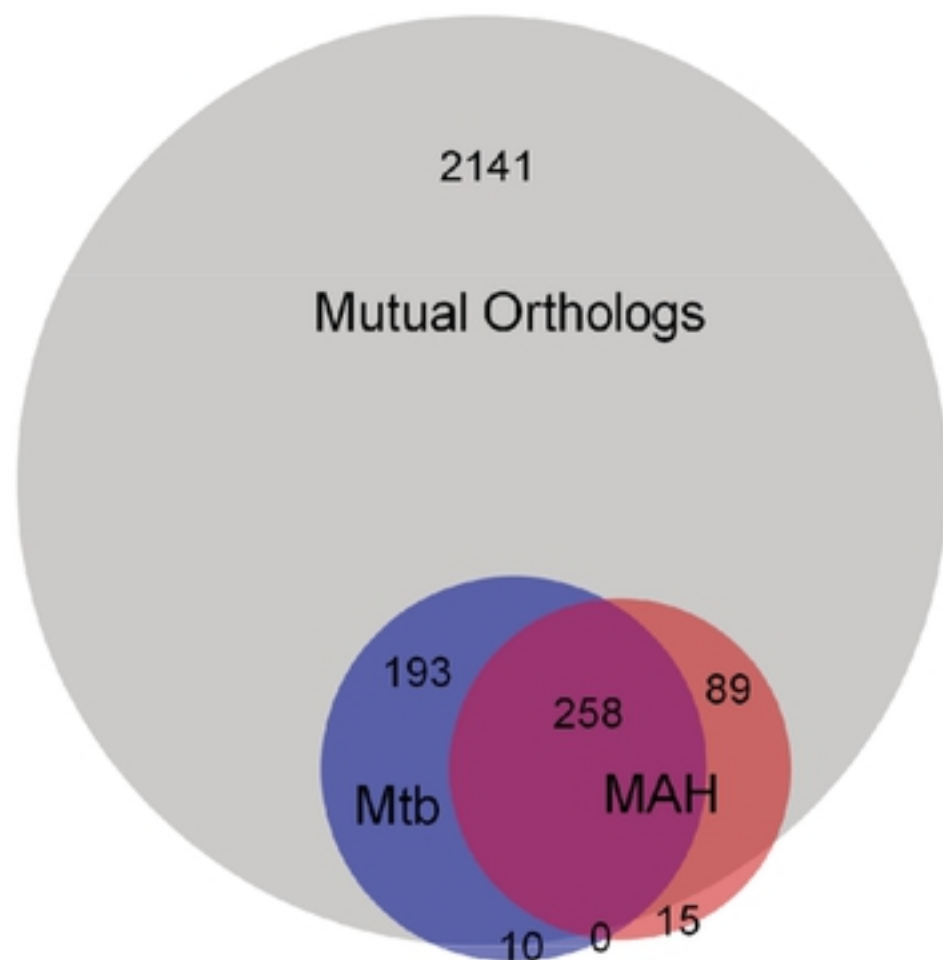

D

*in vivo*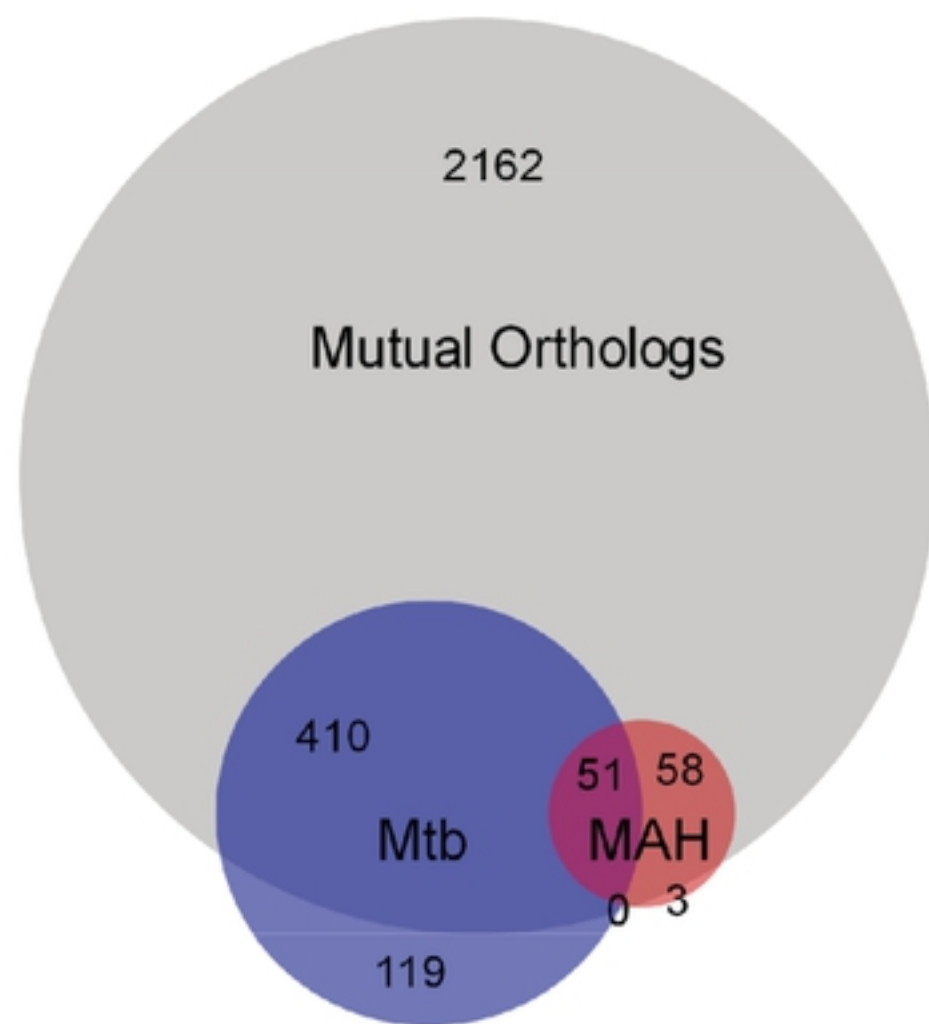

Figure 4

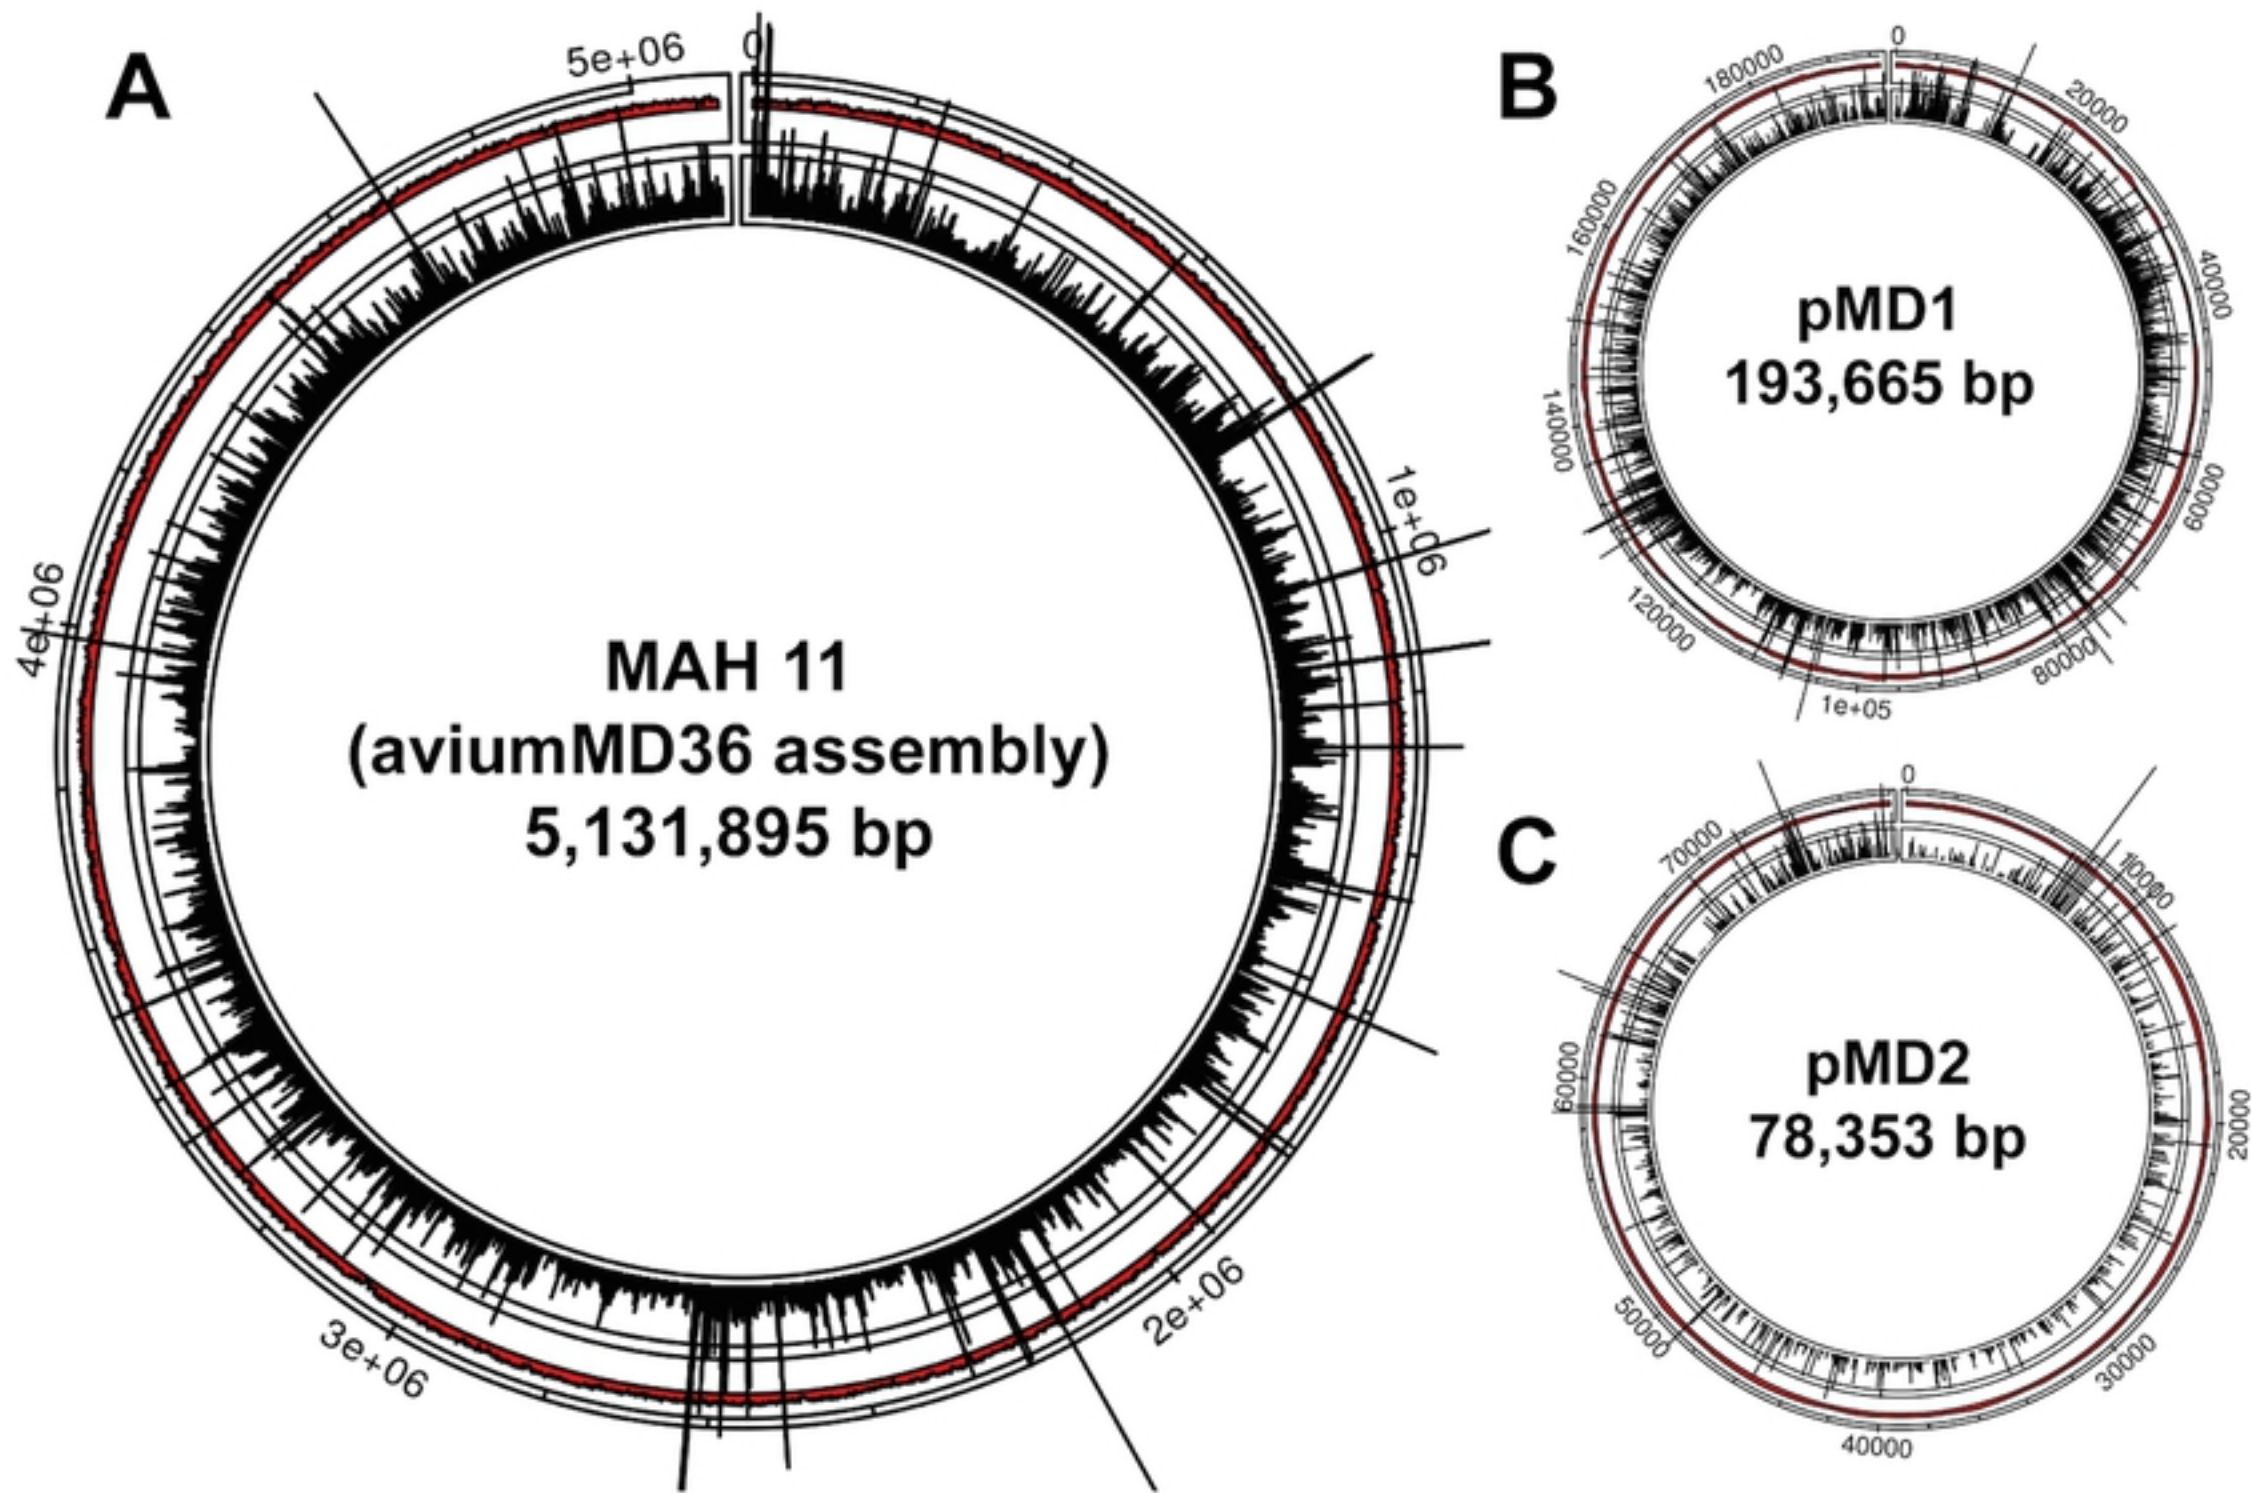

Figure 2



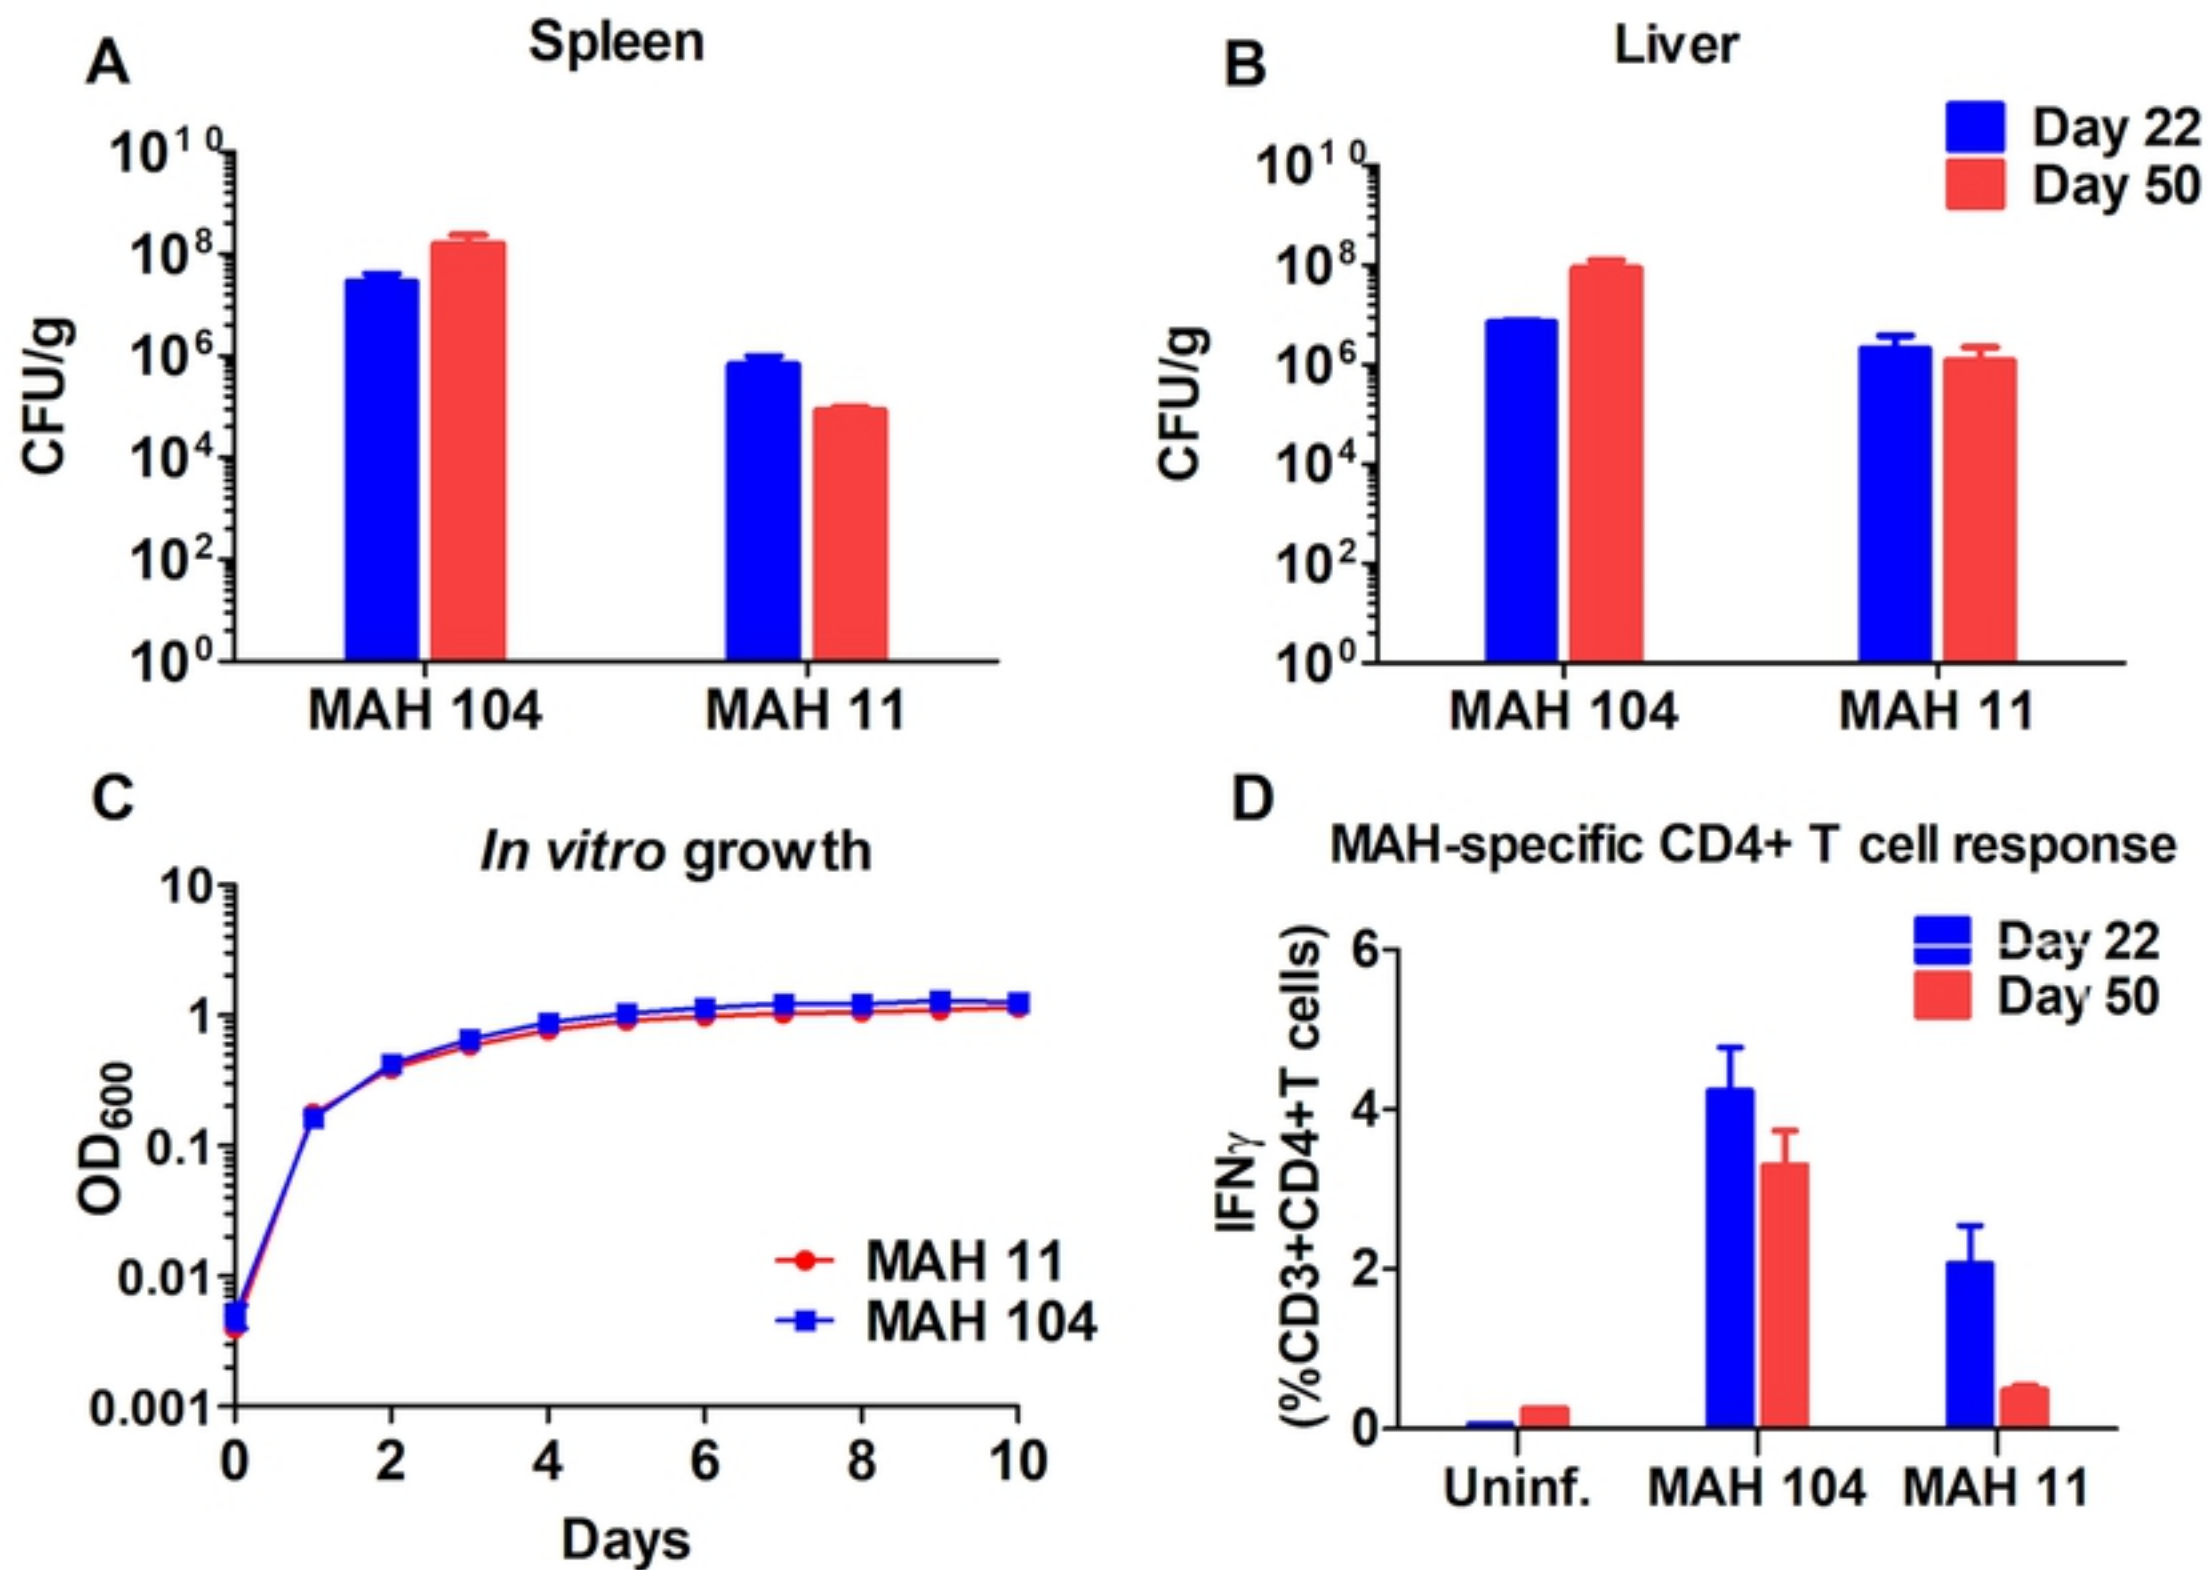

Figure 5

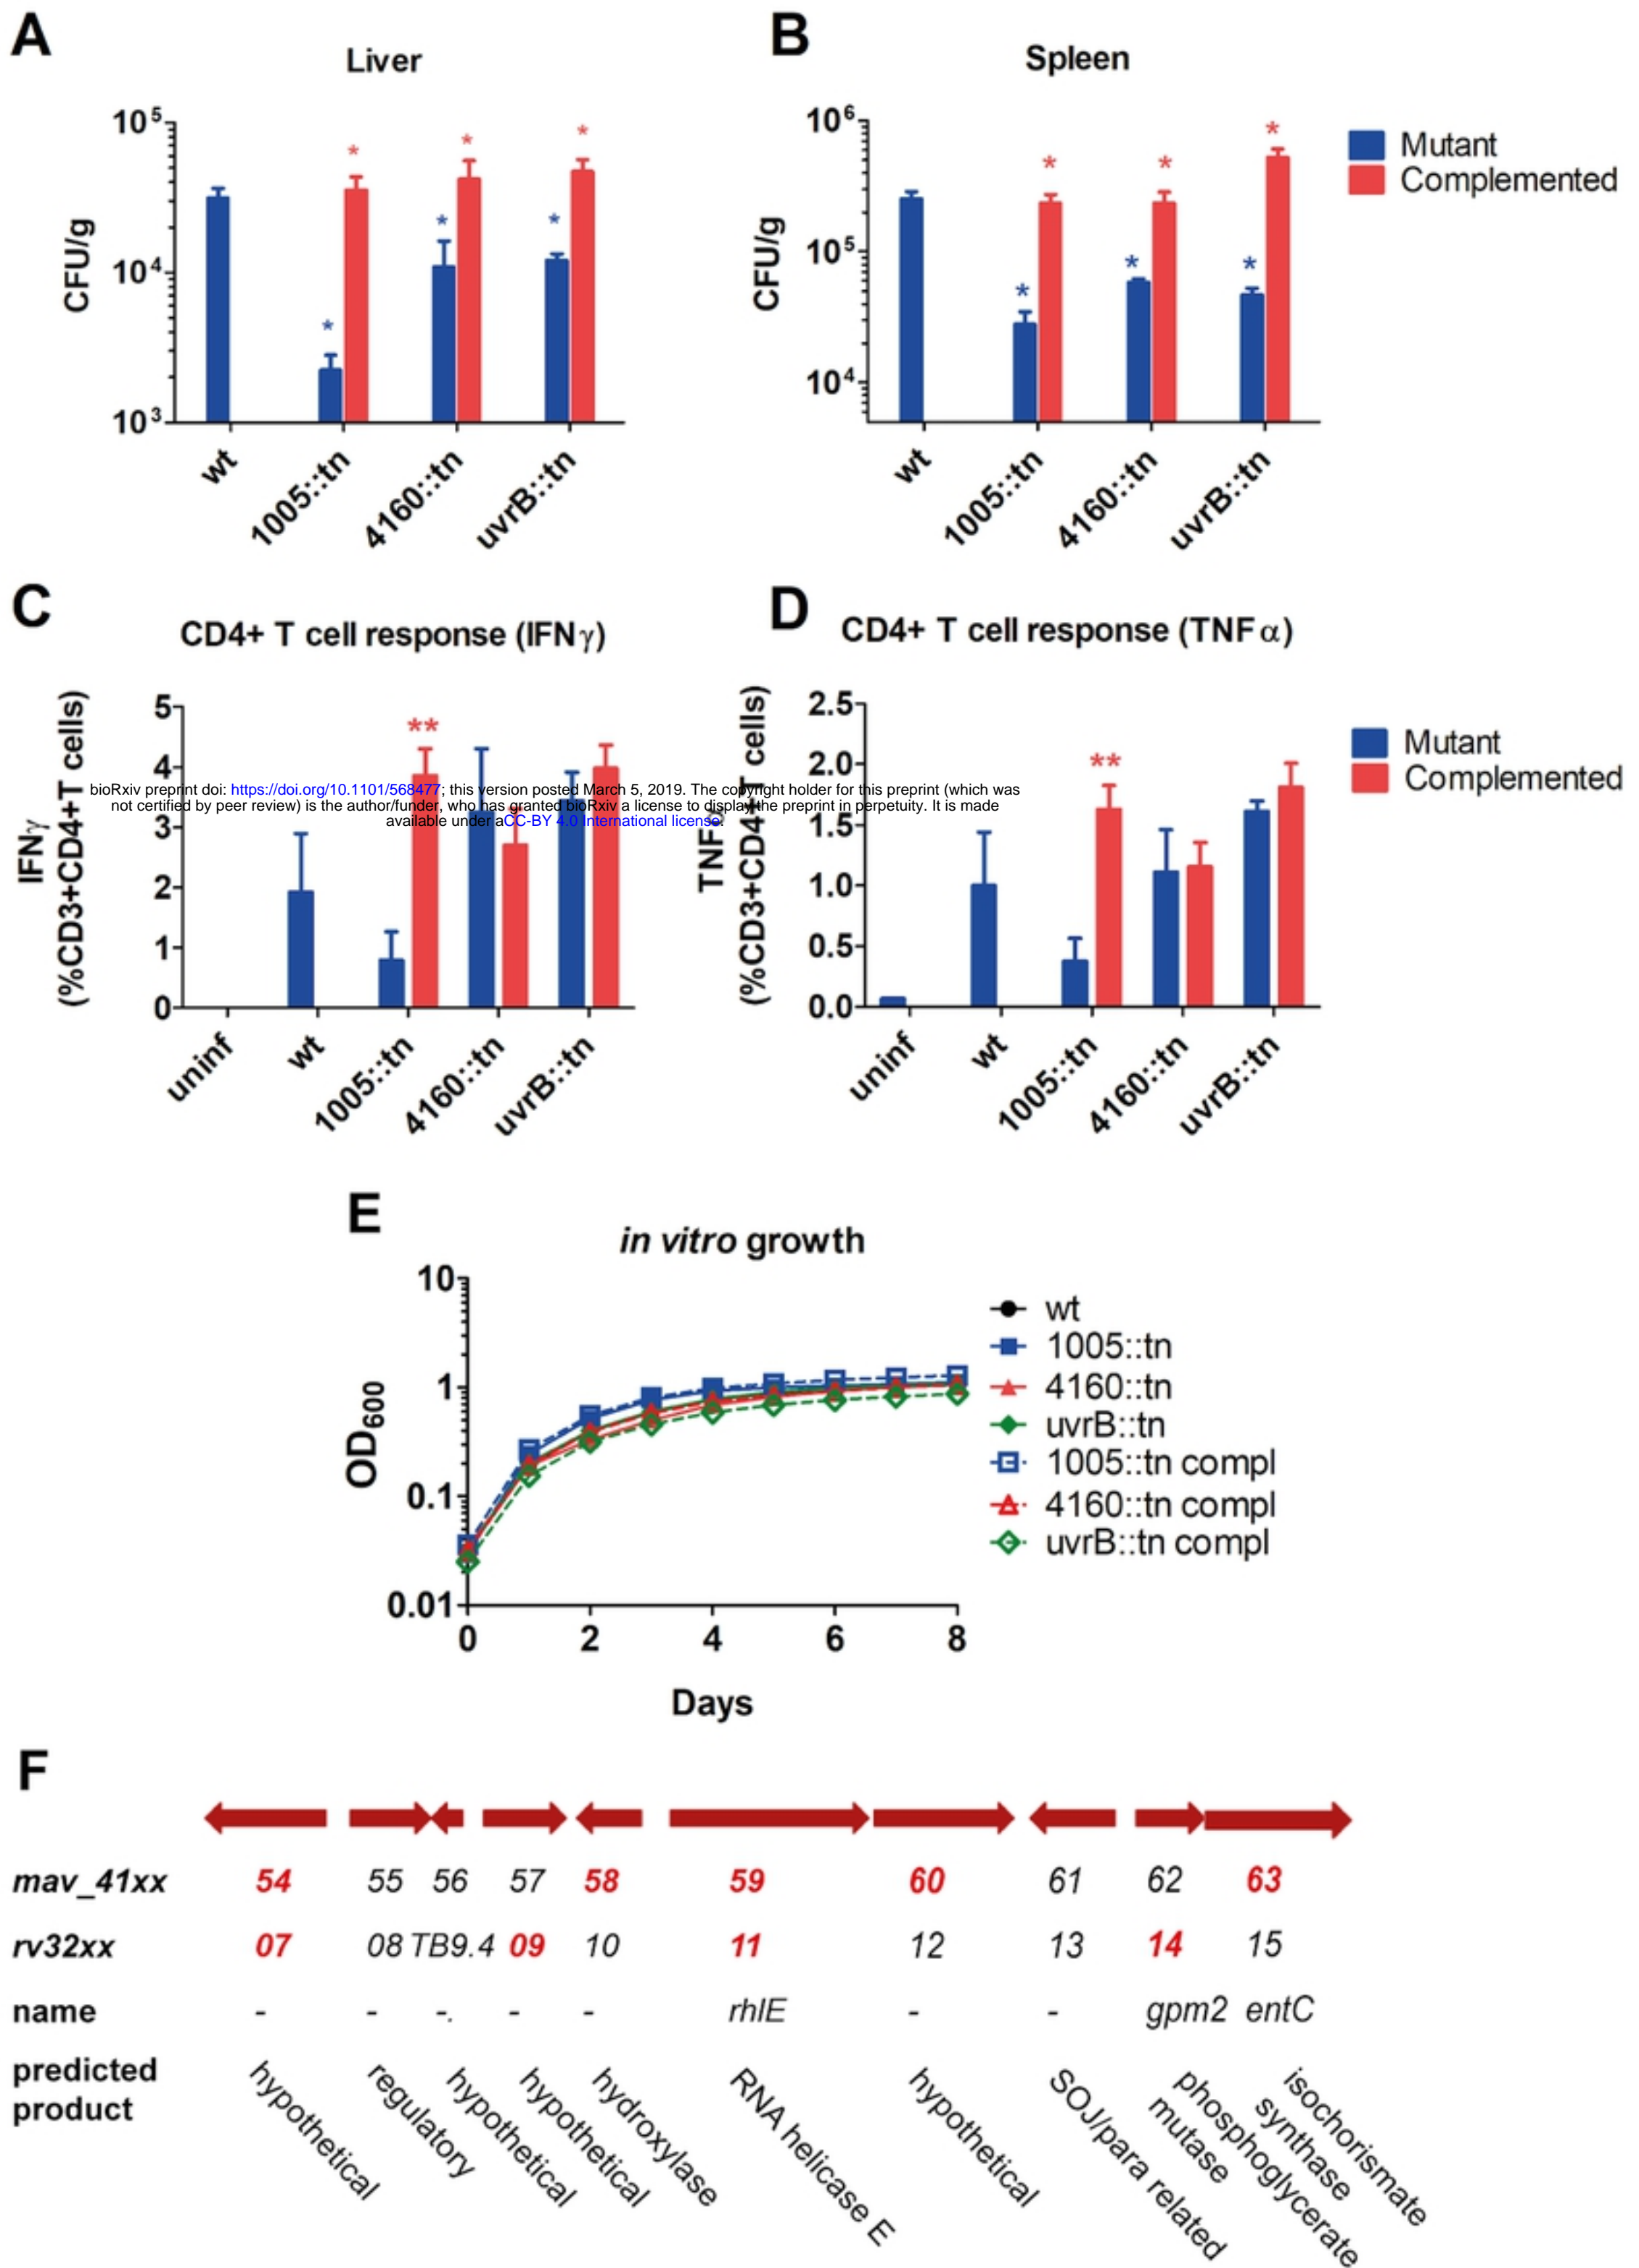

Figure 6
